# Supplementary material
Source: publisher figshare collection journal article supplement (https://acs.figshare.com/ndownloader/files/28904516)
Supplement: Supplementary file 1 [file 28904516]

## Sheet: Sheet1
Chemical Name	Chemical_Formula	solubility predicted by random forest	solubility predicted by gradient boosing	solubility predicted by XG boosing	solubility predicted by ensemble methods
ABIETIC ACID	C20H30O2	16799.7	17585.1	17743.7	17601.7
ACENAPHTHALENE	C12H8	18849.4	20085.1	19412.8	19558.1
ACENAPHTHENE	C12H10	19970	20048.9	20102	20072.9
ACETAL	C6H14O2	15468	14694	14079.8	14402.9
ACETALDEHYDE	C2H4O	20667.9	20068.6	20366.8	20307.4
ACETALDOL	C4H8O2	26037.6	25946.2	26005.1	25990.7
ACETALDOXIME	C2H5NO	24674.7	26674.5	25796.3	25947.6
ACETAMIDE	C2H5NO	32122	31931.6	31946.2	31959.4
ACETANILIDE	C8H9NO	23796.5	22991.2	22959.2	23052.6
ACETIC ACID	C2H4O2	20878.1	19820.2	19864.2	19952.4
ACETIC ANHYDRIDE	C4H6O3	21874.2	21945	21263.8	21529.2
ACETOACETANILIDE	C10H11NO2	23254.1	26342.4	25739.5	25671.8
ACETOACETIC ACID	C4H6O3	26871.8	27237.3	27032.9	27078.1
2-ACETOACETOXY ETHYL METHACRYLATE	C10H14O5	20328.5	19941.8	19970.5	19997.7
ACETOIN	C4H8O2	23779.5	23143.8	23303.9	23303.4
ACETOMETHOXANE	C8H14O4	20293.5	20180.6	19839.2	19987.1
ACETONE	C3H6O	20507.7	20517.8	19893.4	20142.2
ACETONE CYANOHYDRIN	C4H7NO	25447.8	25287.5	25556.2	25464.7
ACETONITRILE	C2H3N	26428.6	26078.5	28160.1	27362.5
ACETOPHENONE	C8H8O	21683.2	21113.9	20210.4	20628.7
ACETOVANILLONE	C9H10O3	22172.8	20897.5	20622.8	20860.2
ACETOXYACETIC ACID	C4H6O4	28230.9	29877.7	29376.1	29412.1
ACETYLACETONE	C5H8O2	20326.1	20113.1	19765.7	19926
ACETYL CHLORIDE	C2H3ClO	20250.3	20137.4	20096.1	20123.9
ACETYLSALICYLIC ACID	C9H8O4	22394.2	22554.4	22239.2	22349.3
ACRIDINE	C13H9N	20912.9	20619.7	20800.9	20757.8
ACROLEIN	C3H4O	20748.2	20618	20432.2	20519.5
ACRYLAMIDE	C3H5NO	28686.5	28929.1	28635.4	28728.6
ACRYLIC ACID	C3H4O2	20688.7	20172.5	20538.4	20443.7
ACRYLONITRILE	C3H3N	22700.9	21873.6	22277.3	22198.6
ACRYLOXY PROPIONIC ACID	C6H8O4	24694.9	25676.5	25668.2	25573.4
ADAMANTANE	C10H16	14332.7	12009	11720.6	12068.3
ADIPIC ACID	C6H10O4	25852.4	26468.8	26527.6	26442.4
ADIPONITRILE	C6H8N2	25255.5	24615.6	24899	24849.7
AGATHADIOL	C20H34O2	18406.1	19382.8	18937.9	19018.2
ALLYL ACETATE	C5H8O2	17592.8	18451.8	17807.7	17979.4
ALLYL ACRYLATE	C6H8O2	19093.9	18054.6	18484.5	18416.5
ALLYL ALCOHOL	C3H6O	23680.2	21942.8	23940.5	23315.1
ALLYLAMINE	C3H7N	19190.3	19214.1	19733.6	19523.4
ALLYL ETHER	C6H10O	16662.2	16774.1	16958.9	16873.8
ALLYL GLYCIDYL ETHER	C6H10O2	19917.3	20218.6	20268.3	20218.3
ALLYLIDENE DIACETATE	C7H10O4	19347.6	19315.1	19951.7	19700.3
ALLYL METHACRYLATE	C7H10O2	18527	18164.5	18052.3	18133.4
ALLYL-TERT-BUTYLPEROXIDE	C7H14O2	15941.8	15985.1	16106.6	16053.7
p-AMINOAZOBENZENE	C12H11N3	20709.6	19774.5	19910.5	19949.6
p-AMINODIPHENYLAMINE	C12H12N2	21375.5	21658.2	21404.7	21477.8
2-AMINOETHOXYETHANOL	C4H11NO2	25491.7	26668.4	27096.4	26807.5
4-(2-AMINOETHYL)MORPHOLINE	C6H14N2O	20072.7	19954.3	20144.8	20080.5
N-AMINOETHYL PIPERAZINE	C6H15N3	20811	20665.8	21205.4	21004.1
6-AMINOHEXANAMIDE	C6H14N2O	22800.5	23607.2	24838	24265
6-AMINOHEXANOL	C6H15NO	21351.2	22586.4	22424.4	22365.7
2-AMINO-2-METHYL-1-PROPANOL	C4H11NO	24484.7	24646.3	24528.1	24559.2
1-AMINO-2-PROPANOL	C3H9NO	25888.2	26925.6	26251.3	26417.3
3-AMINO-1-PROPANOL	C3H9NO	28269.8	29278	29192.5	29125.9
AMMONIA	H3N	23790.8	25066.9	24730.7	24737.6
ANETHOLE	C10H12O	20122	19811.8	20091.2	20010.5
ANILINE	C6H7N	23662.1	23758.4	23417.2	23544
o-ANISIDINE	C7H9NO	22940.9	23087.4	22835.6	22921.7
ANISOLE	C7H8O	19966.3	20168.9	20282.3	20216.7
ANTHRACENE	C14H10	18897.3	17856	17852.2	17957.8
ARGON	Ar	14159	6483.9	13712.2	11588.4
ARSENIC (III) CHLORIDE	AsCl3	22063.9	21743.7	21785.4	21800.7
ASCORBIC ACID	C6H8O6	25790.4	26504.7	26994.1	26726.9
AZELAIC ACID	C9H16O4	24273.9	25764.9	25064.8	25195.8
BENZALDEHYDE	C7H6O	21916.1	21564.9	21368.6	21482.3
BENZAMIDE	C7H7NO	24961.6	24701.3	24732.5	24746.1
BENZANTHRACENE	C18H12	21384.7	21915.5	21690.1	21727.2
BENZENE	C6H6	18852.6	19207.3	18761.5	18904.3
1,4-BENZENEDICARBOXYLIC ACID,BIS(2,3-DIHYDROXYPROPYL)ESTER	C14H18O8	22035.7	20681.2	21329.1	21205.4
1,2-BENZENEDICARBOXYLIC ACID, HEPTYL, NONYL ESTER	C24H38O4	18034.3	18318.9	17942.9	18064.8
1,4-BENZENEDICARBOXYLIC ACID, 2-HYDROXYETHYL METHYL ESTER	C11H12O5	20831	20510	20631.5	20615
1,2-BENZENEDIOL	C6H6O2	25419.3	24799.2	24754.2	24834.2
1,3-BENZENEDIOL	C6H6O2	27801.1	28407.8	28288.8	28275.7
BENZENE-1,2,4-TRICARBOXYLIC ACID TRIMETHYL ESTER	C12H12O6	20799.8	22825.4	21920.9	22080.1
1,2,3-BENZENETRIOL	C6H6O3	21876.6	21517.3	21598.5	21602
BENZIDINE	C12H12N2	22002.4	22646.2	22469.1	22475.6
BENZO[a]PYRENE	C20H12	20687.6	20762.8	20811	20784.2
BENZO[b]FLUORANTHENE	C20H12	20805	21157.8	20972.2	21011.2
BENZOIC ACID	C7H6O2	23833.7	24196.5	23845.1	23949.4
BENZONITRILE	C7H5N	22532.3	22448.7	22646.8	22575.9
BENZOPHENONE	C13H10O	21596.8	21027.8	20794.6	20944.8
BENZOTHIOPHENE	C8H6S	21874.4	21409.1	21419.2	21461.7
BENZOTRIFLUORIDE	C7H5F3	19024.1	18212.8	17946.1	18133.9
BENZOYL CHLORIDE	C7H5ClO	20753.9	20182.3	19813.4	20018.1
BENZOYL PEROXIDE	C14H10O4	21537.4	21649.2	21656	21642.1
BENZYL ACETATE	C9H10O2	19758.3	20194.1	19816.7	19924.1
BENZYL ALCOHOL	C7H8O	23429.5	23957.6	25594	24886.6
BENZYLAMINE	C7H9N	21164.8	21626.4	21497.7	21503
BENZYL BENZOATE	C14H12O2	20500.8	20584.7	20864.4	20744.2
BENZYL CHLORIDE	C7H7Cl	20185.8	20333.2	20090.5	20172.9
BENZYL DICHLORIDE	C7H6Cl2	19726.6	19924.4	20254.3	20102.6
BENZYL ETHYL ETHER	C9H12O	18832.8	18623.8	18658.8	18665.7
BENZYL FORMATE	C8H8O2	20857.5	20575.8	20710	20684.5
BENZYL MERCAPTAN	C7H8S	21199.4	21331.7	21253.4	21271.5
BICYCLO[2.2.1]HEPTANE	C7H12	15450.9	15665.1	15151.8	15335.7
BICYCLOHEXYL	C12H22	16959.6	17875.5	17155.8	17352.1
BIPHENYL	C12H10	19587.6	19505.7	19071.5	19253.4
BIS-(2-AMINOETHYL)ETHER	C4H12N2O	20268.9	20177.3	20233.2	20220
1,4-BIS(3-AMINOPROPYL)PIPERAZINE	C10H24N4	19541.7	19483.3	19751.7	19650.2
BIS(CHLOROMETHYL)ETHER	C2H4Cl2O	20026.7	20523.4	20070.9	20202.2
BIS(CYANOETHYL)ETHER	C6H8N2O	23310.2	26609.4	26237.3	26056.2
BIS(DIFLUOROMETHYL)ETHER	C2H2F4O	15528.5	15746.3	16134.1	15957.2
BIS(alpha-METHYLBENZYL) ETHER	C16H18O	18289.8	17881.7	18561	18330.1
BISPHENOL A	C15H16O2	22199.7	23034.5	23060.7	22966.7
BIS[3-(TRIETHOXYSILYL)PROPYL]DISULFIDE	C18H42O6S2Si2	16122.6	17151	16326.1	16553.2
BIS(TRIFLUOROMETHYL)SULFIDE	C2F6S	13901.5	11634.1	11576	11826
BIS[3-(TRIMETHOXYSILYL)PROPYL]DISULFIDE	C12H30O6S2Si2	17452.6	16666.9	16778.6	16812.5
BORON TRIFLUORIDE	BF3	16296	18809.6	18238.6	18215.6
BROMINE	Br2	23156.6	23952.2	23938.3	23864.3
BROMOBENZENE	C6H5Br	20442	20561	20849.9	20722.4
1-BROMOBUTANE	C4H9Br	18212.3	18178.8	17876.4	18000.7
2-BROMOBUTANE	C4H9Br	17875.1	17430	17798.4	17695.5
BROMOCHLOROMETHANE	CH2BrCl	20777.5	21303.8	20993.7	21065.1
BROMODIFLUOROMETHANE	CHBrF2	15224.8	16136.7	15668.6	15764.7
1-BROMODODECANE	C12H25Br	17533.1	17379.1	17557.9	17501.8
BROMOETHANE	C2H5Br	18574.6	18592	18618	18605.9
1-BROMOHEPTANE	C7H15Br	17285.1	17475.2	17687.8	17583.7
BROMOMETHANE	CH3Br	19569.5	17352.7	19483.5	18852.9
1-BROMONAPHTHALENE	C10H7Br	21353.9	21517.7	21454.2	21463.2
1-BROMOPROPANE	C3H7Br	18115.4	18293.9	18143.2	18185.6
2-BROMOPROPANE	C3H7Br	17716	16976.6	17140.7	17149
p-BROMOTOLUENE	C7H7Br	19912.8	19581.1	19483.3	19555.6
BROMOTRICHLOROMETHANE	CBrCl3	18500.6	18165.2	17827	17995.8
BROMOTRIFLUOROETHYLENE	C2BrF3	14616.9	14597.4	14455.3	14514.1
BROMOTRIFLUOROMETHANE	CBrF3	11893.5	8470.04	9819.48	9622.05
1,2-BUTADIENE	C4H6	16170.2	15935.2	15961.1	15974.2
1,3-BUTADIENE	C4H6	16209.1	15316.3	15277.1	15382.1
BUTANAL	C4H8O	19007.1	19229.8	18921.6	19022.6
n-BUTANE	C4H10	13345.9	13806.8	13359.2	13492.1
1,4-BUTANEDIISOCYANATE	C6H8N2O2	20995.4	21894.5	21806.2	21751.6
1,2-BUTANEDIOL	C4H10O2	25791.7	27127.8	25799.2	26197
1,3-BUTANEDIOL	C4H10O2	27026.6	27390.4	27339.5	27323.5
1,4-BUTANEDIOL	C4H10O2	28298.1	29392.1	29164.1	29145.9
2,3-BUTANEDIOL	C4H10O2	25658.4	26530.7	26472	26408.3
1,2,3-BUTANETRIOL	C4H10O3	31803.9	34040.3	33645.8	33579.9
1,2,4-BUTANETRIOL	C4H10O3	33369.3	36763.6	37154.7	36658.8
1-BUTANOL	C4H10O	22645.4	23261.7	23068.2	23084
2-BUTANOL	C4H10O	22089.7	21873.8	22229.2	22108.6
1-BUTENE	C4H8	13638.8	13278	13447	13415.5
cis-2-BUTENE	C4H8	14346	14678.1	14217.2	14368.3
trans-2-BUTENE	C4H8	14034.4	14288.6	14585.7	14441.4
cis-2-BUTENE-1,4-DIOL	C4H8O2	29002.3	32266	31227.1	31316.3
trans-2-BUTENE-1,4-DIOL	C4H8O2	28846.7	27756.6	28442.2	28277
2-BUTOXIME	C4H9NO	22361.7	22663.8	22123.5	22309.4
2-BUTOXYETHANOL	C6H14O2	19943.4	20268.4	20274.1	20239.3
2-(2-BUTOXYETHOXY)ETHANOL	C8H18O3	19623.1	20032.7	19852.4	19883.6
n-BUTYL ACETATE	C6H12O2	17529.1	17559.3	17556	17554.3
t-BUTYL ACETOACETATE	C8H14O3	18094.3	18543.2	18412.7	18420
n-BUTYL ACRYLATE	C7H12O2	17987	18136.6	18321.9	18232.8
n-BUTYLAMINE	C4H11N	18162.4	18178.6	17787.2	17942.1
n-BUTYLBENZENE	C10H14	17308.3	17534.6	17218.4	17322.2
n-BUTYLBENZENE HYDROPEROXIDE	C10H14O2	22570.8	23445.9	23406.2	23334.6
n-BUTYL BENZOATE	C11H14O2	18832.8	19258.9	19105.8	19124.5
2-BUTYLBENZOTHIOPHENE	C12H14S	18254.9	17203.4	17493.9	17482.8
n-BUTYL CHLORIDE	C4H9Cl	17401.3	17738.5	17181.2	17370.4
n-BUTYLCYCLOHEXANE	C10H20	16288.7	16288.9	16302.8	16297.2
n-BUTYLCYCLOPENTANE	C9H18	16077.3	16469.8	16270.9	16311.2
2-BUTYL-1-DECANOL	C14H30O	18638.6	18141.2	18389.8	18340.1
n-BUTYL ETHYL ETHER	C6H14O	15479.2	15651.1	15242.6	15388.8
2-BUTYL-2-ETHYL-1,3-PROPANEDIOL	C9H20O2	21282.1	21837.4	21554.7	21612.2
n-BUTYL FORMATE	C5H10O2	18006.2	17912.4	17679	17781.7
n-BUTYLHYDROPEROXIDE	C4H10O2	22066.2	22240.8	23075.4	22724.1
t-BUTYL HYDROPEROXIDE	C4H10O2	21079.5	21340.3	21793.5	21586.1
n-BUTYL IODIDE	C4H9I	18448	18527.2	18255.5	18356.2
n-BUTYL ISOCYANATE	C5H9NO	18955.8	18581.4	19025.3	18885.2
n-BUTYL MERCAPTAN	C4H10S	17719.3	17694.4	17838.9	17783.6
n-BUTYL METHACRYLATE	C8H14O2	17104.1	17221.3	17426.1	17332.5
1-n-BUTYLNAPHTHALENE	C14H16	19289.3	19134.7	19361.5	19286.2
n-BUTYL n-BUTYRATE	C8H16O2	16761.9	17079.8	16876.5	16926.1
n-BUTYL NONANOATE	C13H26O2	16620.7	16398.7	16456.1	16455.3
2-BUTYL-NONAN-1-OL	C13H28O	18571.9	18748.1	18928	18838.4
2-BUTYL-OCTAN-1-OL	C12H26O	18189.6	18193.2	18391.8	18312
n-BUTYL PROPIONATE	C7H14O2	17010.1	17049	17239.5	17159.4
n-BUTYL STEARATE	C22H44O2	16211.5	16196.1	16228.8	16217.3
n-BUTYL VALERATE	C9H18O2	16649.7	16477.4	16512.9	16516
BUTYL VINYL ETHER	C6H12O	16335.3	15943.7	16023	16030.5
2-BUTYNE-1,4-DIOL	C4H6O2	29113.2	32983.1	31540.1	31730.3
n-BUTYRIC ACID	C4H8O2	20350.8	21361	20518.7	20754.6
BUTYRIC ANHYDRIDE	C8H14O3	18300.3	19080.2	18288.3	18527.1
gamma-BUTYROLACTONE	C4H6O2	26104	25998.1	25929.8	25967.7
BUTYRONITRILE	C4H7N	21086.3	21177.9	20931	21020.6
CAMPHENE	C10H16	16468.7	15840.3	16110	16065
CAMPHOR	C10H16O	16928.4	14886.9	15017.1	15169.2
epsilon-CAPROLACTAM	C6H11NO	25547.5	25930.9	25731.6	25773
epsilon-CAPROLACTONE	C6H10O2	26891.7	29442.5	29130.4	29000.1
CARBAMYL CHLORIDE	CH2ClNO	20713.6	19184.7	19101.2	19287.5
CARBON DISULFIDE	CS2	20487.4	20440.1	20475.7	20466.2
CARBON MONOXIDE	CO	13371.8	8347.29	12390.9	11275.9
CARBON TETRACHLORIDE	CCl4	17451.7	17483	17529.2	17507.6
CARBON TETRAFLUORIDE	CF4	13537.6	13810.3	13595.1	13653.9
CARBONYL FLUORIDE	CF2O	15059.8	16081	15784	15800.7
CARBONYL SULFIDE	COS	14659.5	14036	13951.1	14047.4
CELLOBIOSE	C12H22O11	20575.4	21499.9	21839.3	21611.1
CETYL METHACRYLATE	C20H38O2	15435.9	15394.9	15535.3	15483.2
CHLORINE	Cl2	17081.1	17276.3	17494.3	17387.6
CHLORINE TRIFLUORIDE	ClF3	18899.4	21729.4	21163.3	21106.7
CHLOROACETALDEHYDE	C2H3ClO	23386.3	22802.5	22835.2	22880.5
CHLOROACETIC ACID	C2H3ClO2	27720.1	28718.6	28572.7	28531.2
CHLOROACETYL CHLORIDE	C2H2Cl2O	21603.2	21569.9	21357.7	21445.9
m-CHLOROANILINE	C6H6ClN	23661.8	23587.4	23893.5	23778.5
o-CHLOROANILINE	C6H6ClN	23411.1	23490.3	23536.9	23510.4
p-CHLOROANILINE	C6H6ClN	23047.1	22536.7	22745.1	22712.8
p-CHLOROBENZOTRIFLUORIDE	C7H4ClF3	17837.6	17748.9	17749.8	17758.3
m-CHLOROBENZOYL CHLORIDE	C7H4Cl2O	22160.4	21643.6	21141.8	21394.2
CHLOROCYCLOHEXANE	C6H11Cl	18763.2	18802.9	18940.3	18881.4
1-CHLORO-1,1-DIFLUOROETHANE	C2H3ClF2	14380	14164.5	14287.6	14259.9
2-CHLORO-1,1-DIFLUOROETHYLENE	C2HClF2	14379.9	14525.4	14237.7	14338.2
CHLORODIFLUOROMETHANE	CHClF2	13755.7	13685.9	13460.1	13557.4
1-CHLORO-2,4-DINITROBENZENE	C6H3ClN2O4	24830.9	24745.1	24815.1	24795.7
2-CHLOROETHANOL	C2H5ClO	24658.7	24852.2	25148.2	25010.5
CHLOROFLUOROMETHANE	CH2ClF	17618.8	17983.2	17921.7	17909.9
CHLOROFORM	CHCl3	18540.1	18750	19490.2	19173.1
CHLOROMETHYL METHYL ETHER	C2H5ClO	18946.2	19608.2	19426	19432.7
1-CHLORONAPHTHALENE	C10H7Cl	21313.6	21525.5	21390.6	21423.4
m-CHLORONITROBENZENE	C6H4ClNO2	21906.1	21760.1	21415.3	21567.8
o-CHLORONITROBENZENE	C6H4ClNO2	22612.5	21930.3	21826.5	21936.3
CHLOROPENTAFLUOROETHANE	C2ClF5	12770.3	9747.49	10408.2	10446.2
1-CHLOROPENTANE	C5H11Cl	17273.9	17741.5	17239.7	17393.7
m-CHLOROPHENOL	C6H5ClO	22693.9	22338.4	22189.8	22284.8
o-CHLOROPHENOL	C6H5ClO	21747.8	21175.7	21563.5	21465.6
p-CHLOROPHENOL	C6H5ClO	23012.2	23402.9	23249.4	23271.8
CHLOROPRENE	C4H5Cl	17298.4	16904	16862.6	16918.6
2-CHLORO-1,3-PROPANEDIOL	C3H7ClO2	29638.9	30749.5	30753.2	30640.6
3-CHLORO-1,2-PROPANEDIOL	C3H7ClO2	27411.2	27549	27581.8	27554.9
1-CHLORO-2-PROPANOL	C3H7ClO	23079.4	23176.2	22729.6	22898.6
1-CHLORO-3-PROPANOL	C3H7ClO	24806.4	24798.5	24779.1	24787.7
2-CHLOROPROPENE	C3H5Cl	16258.2	16106.5	16305.8	16241.2
3-CHLOROPROPENE	C3H5Cl	18225.9	18161.7	18183.3	18181.1
3-CHLOROPROPYLDIMETHYLCHLOROSILANE	C5H12Cl2Si	18215.2	17371.4	17565.8	17572.4
3-CHLOROPROPYLTRICHLOROSILANE	C3H6Cl4Si	17486.4	17407	17361.8	17387.9
3-CHLOROPROPYLTRIMETHOXYSILANE	C6H15ClO3Si	17189.6	16912.3	17023.6	17006.8
2-CHLORO-1,1,1,2-TETRAFLUOROETHANE	C2HClF4	13260.2	11482.6	12759.4	12426.5
o-CHLOROTOLUENE	C7H7Cl	19369	19662.4	19482.2	19524.9
p-CHLOROTOLUENE	C7H7Cl	20500.3	19495	19627.1	19674.8
2-CHLORO-1,1,1-TRIFLUOROETHANE	C2H2ClF3	15568.8	16280.4	16453.9	16313.3
CHLOROTRIFLUOROETHYLENE	C2ClF3	12399	12491.7	12747.7	12636
CHLOROTRIFLUOROMETHANE	CClF3	6570.29	3904.29	3841.52	4133.23
3-CHLORO-o-XYLENE	C8H9Cl	19142.5	19133.6	19372.6	19277.9
4-CHLORO-o-XYLENE	C8H9Cl	19278.6	19312.5	19307.8	19306.3
beta-CHOLESTEROL	C27H46O	16852.2	15915.1	17350.5	16870
CHRYSENE	C18H12	19372.3	19010.7	18837.5	18943
CINNAMIC ACID	C9H8O2	23794.3	24330	24393.7	24314.7
CITRACONIC ACID	C5H6O4	29009	32056.9	31759.7	31573.8
CITRIC ACID	C6H8O7	25811.8	27539.1	27666.9	27443.1
m-CRESOL	C7H8O	23514.7	23372.1	24280.8	23931.6
o-CRESOL	C7H8O	23027.4	22997.9	23030.7	23020.5
p-CRESOL	C7H8O	23878.4	24215	24207.2	24176.7
cis-CROTONALDEHYDE	C4H6O	21591.2	18523.6	20887.3	20248.6
trans-CROTONALDEHYDE	C4H6O	21418	21156.9	21563.6	21427
cis-CROTONIC ACID	C4H6O2	24537.7	25036	25338.4	25167.6
trans-CROTONIC ACID	C4H6O2	25268.2	23648.2	25634.6	25002.1
cis-CROTONITRILE	C4H5N	21431.5	21138.5	21616.7	21454.7
trans-CROTONITRILE	C4H5N	21882.8	21541.9	21942.8	21816.5
n-CROTYL ACETATE	C6H10O2	18951.6	18620.4	18545.4	18608.5
CROTYL GLYCOL ETHER	C6H12O2	20547.2	21289.4	21105.4	21104.8
CUMENE	C9H12	17568.9	17351.1	17377.1	17388.5
CUMENE HYDROPEROXIDE	C9H12O2	19170.2	17803.1	18335.2	18259.1
p-CUMYLPHENOL	C15H16O	20356.4	20053.8	20223.1	20185.7
CYANOGEN	C2N2	16066.1	17310.8	17397	17238
CYANOGEN CHLORIDE	CClN	22001.3	20503.1	21994.5	21547.7
CYCLOBUTANE	C4H8	15473.3	15941.1	16113.3	15997.6
1,5,9-CYCLODODECATRIENE	C12H18	16683.8	16929.8	16837.5	16849.9
CYCLOHEPTANE	C7H14	16621.7	17264.4	17308.9	17226.8
CYCLOHEPTENE	C7H12	17331.8	17020	17871.2	17561.9
1,3-CYCLOHEXADIENE	C6H8	17915.3	17615.6	17863.4	17794.2
1,4-CYCLOHEXADIENE	C6H8	17509.7	18294.1	18106.5	18103.1
CYCLOHEXANE	C6H12	16529.9	16925	16610.5	16696.7
CYCLOHEXANECARBOXALDEHYDE	C7H12O	19635.5	18921.2	19049.7	19069.8
1,4-CYCLOHEXANEDIMETHANOL	C8H16O2	23418.4	23634.8	23976.9	23818.4
CYCLOHEXANOL	C6H12O	23310.3	23685.8	23283.8	23407
CYCLOHEXANONE	C6H10O	21538.6	23106	22658.2	22680.6
CYCLOHEXENE	C6H10	17075.4	17178.2	16958.3	17036
2-CYCLOHEXENE-1-ONE	C6H8O	22293.4	22078.8	21806.7	21937
2-CYCLOHEXENYL CYCLOHEXANONE	C12H18O	19536.7	19715.2	19837.6	19770.8
CYCLOHEXYL ACETATE	C8H14O2	17869.5	18428.7	18481.8	18404.7
CYCLOHEXYLBENZENE	C12H16	18983.8	18779.6	18862.7	18849.9
2-CYCLOHEXYL CYCLOHEXANONE	C12H20O	20724.4	20726	20763.9	20748.6
1-CYCLOHEXYLETHANONE	C8H14O	19391.1	19609.5	19275.3	19387.2
CYCLOHEXYL FORMATE	C7H12O2	19153.9	19054.7	18896.4	18969.7
CYCLOHEXYL HYDROPEROXIDE	C6H12O2	22411.9	22926.7	23344.5	23125.9
CYCLOHEXYL ISOCYANATE	C7H11NO	20958.1	20874.3	21150	21048.1
CYCLOHEXYL MERCAPTAN	C6H12S	18714.3	18810.7	18890.8	18849.1
1,5-CYCLOOCTADIENE	C8H12	18508.3	18580.1	18741.3	18669.6
CYCLOOCTANE	C8H16	16992.7	17727.6	17340.6	17421.9
1,3,5,7-CYCLOOCTATETRAENE	C8H8	18895.5	18407.4	18100.4	18272
CYCLOOCTENE	C8H14	17606	17657.3	17527.5	17574.3
CYCLOPENTADIENE	C5H6	17092.2	17318.9	17027.9	17121.7
CYCLOPENTANE	C5H10	16049.4	16718.9	16598.5	16579.7
CYCLOPENTANONE	C5H8O	21545.5	22033.2	21525.5	21679.8
CYCLOPENTENE	C5H8	16478.1	16781.9	16808.8	16767.6
CYCLOPENTYLACETIC ACID	C7H12O2	23859.3	24627.2	23911.3	24120.9
CYCLOPENTYLAMINE	C5H11N	18748.9	19182.1	19082.2	19078.9
CYCLOPROPANE	C3H6	14681	14359.1	14503.3	14477.8
CYCLOPROPANECARBOXAMIDE	C4H7NO	28820.3	28969.9	28878	28899.8
CYCLOPROPANE CARBOXYLIC ACID	C4H6O2	24687.3	25055.7	25041	25010
CYCLOPROPYLAMINE	C3H7N	20040.4	19914.2	20060	20014.3
CYCLOPROPYL CYANIDE	C4H5N	23990.9	23102.6	24014	23738.3
m-CYMENE	C10H14	17154.6	16966.6	17116.9	17075.6
o-CYMENE	C10H14	17315.3	17162.1	16966.2	17059.9
p-CYMENE	C10H14	17198.6	16979	17065.9	17053.1
1,9-DECADIENE	C10H18	16055.2	15921.6	16151.2	16072.7
DECAFLUOROBUTANE	C4F10	11365.7	10444.3	11155.2	10963
1,1,1,2,2,3,4,5,5,5-DECAFLUOROPENTANE	C5H2F10	13010.6	13791	13434.5	13499.1
cis-DECAHYDRONAPHTHALENE	C10H18	17529.3	17887.1	17592.8	17674.7
trans-DECAHYDRONAPHTHALENE	C10H18	16915.6	17425	17267.7	17279.7
DECAMETHYLCYCLOPENTASILOXANE	C10H30O5Si5	12455	11714.4	11946.9	11928
DECAMETHYLTETRASILOXANE	C10H30O3Si4	12232.7	11625.6	11776	11776.5
DECANAL	C10H20O	17603.2	17630.7	17751.7	17700.5
DECAN-1,10-DIOL	C10H22O2	21303.4	21461	21700	21588.6
n-DECANE	C10H22	16008	15533.9	16063.9	15899.3
n-DECANOIC ACID	C10H20O2	20791.8	20864	20135.1	20419.4
1-DECANOL	C10H22O	19334	19639.8	19246	19373
1-DECENE	C10H20	15666.8	15832.5	15687.4	15728.9
cis-2-DECENE	C10H20	15783.7	15866.2	15780.5	15806.6
trans-2-DECENE	C10H20	15874.7	16074.3	15789.3	15883.4
n-DECYL ACETATE	C12H24O2	17602.1	17391.6	17566.5	17517.6
n-DECYLBENZENE	C16H26	17157.9	17169.5	17076.1	17112.3
n-DECYLCYCLOHEXANE	C16H32	16251.1	17693.8	16655.2	16926.4
n-DECYL FORMATE	C11H22O2	17052	17010.7	17176.7	17114.5
n-DECYL MERCAPTAN	C10H22S	17470.7	17259.6	17351.2	17335.6
1-n-DECYLNAPHTHALENE	C20H28	18057	18085.4	17918.3	17982.3
1-DECYNE	C10H18	16908.9	16564.2	16868.7	16781.4
DEHYDROABIETYLAMINE	C20H31N	18035.4	17772	17907.8	17879.8
DEUTERIUM OXIDE	D2O	39712.8	47059.2	48310	47075.1
DEXTROSE	C6H12O6	22502.2	20945.6	21164.4	21232.5
DIACETONE ALCOHOL	C6H12O2	20011	20532.2	20284.7	20331.6
DIACETYL	C4H6O2	20329.7	20366.6	20550.2	20473.1
DIALLYLAMINE	C6H11N	17663.1	17253.6	17609.6	17508.2
DIALLYL PHTHALATE	C14H14O4	19742.6	19873.5	19988.5	19929.4
2,4-DIAMINOTOLUENE	C7H10N2	23689.9	23901.5	23713.8	23767.7
2,6-DIAMINOTOLUENE	C7H10N2	22035	21974.7	22183.8	22106.2
DIAMYLAMINE	C10H23N	17075.8	17228	17232.8	17215.7
DIAMYL KETONE	C11H22O	17648.4	17631.6	17674.5	17659
DIBENZOFURAN	C12H8O	20065.9	19660.9	19891.2	19839.6
DIBENZOPYRROLE	C12H9N	23897.8	21843.5	23024.8	22757.7
DIBENZOTHIOPHENE	C12H8S	20514.5	20796.4	20716.1	20720
DIBENZYL ETHER	C14H14O	19117.9	20001.4	19899.6	19852
1,4-DIBROMOBENZENE	C6H4Br2	19752.6	19583.8	19635.2	19631.5
m-DIBROMOBENZENE	C6H4Br2	21196.6	20848.4	21008.2	20979.1
DIBROMODIFLUOROMETHANE	CBr2F2	17321.3	15284.5	15042	15342.7
1,2-DIBROMODODECANE	C12H24Br2	16834.7	17104.1	16899.6	16954.5
1,1-DIBROMOETHANE	C2H4Br2	20051	20019.3	20112.9	20078.6
1,2-DIBROMOETHANE	C2H4Br2	21067.2	20655.6	21051.1	20934
DIBROMOMETHANE	CH2Br2	21424.1	22004.9	21966.3	21923.6
1,2-DIBROMOPROPANE	C3H6Br2	19342.4	19011	19128.9	19114.9
1,3-DIBROMOPROPANE	C3H6Br2	20526.9	21789	20731	21028
1,2-DIBROMOTETRAFLUOROETHANE	C2Br2F4	14784.5	14805.8	14854.9	14833.1
DI-n-BUTYLAMINE	C8H19N	16691.1	16394.2	16697.4	16605.8
DI-n-BUTYL DISULFIDE	C8H18S2	17836	17482.8	17721	17661
DI-n-BUTYL ETHER	C8H18O	15915.1	15422.9	15324.1	15412.9
DIBUTYL MALEATE	C12H20O4	18819.6	18227.9	18924.3	18704.9
DI-t-BUTYL PEROXIDE	C8H18O2	15054.1	14042.8	13362.8	13735.9
DI-n-BUTYL PHTHALATE	C16H22O4	18742.6	18710.5	18389.2	18520.9
DIBUTYL SEBACATE	C18H34O4	17653.4	17102.4	17666	17495.7
DI-n-BUTYL SULFATE	C8H18O4S	18631.3	19066.5	19135.4	19064.3
DI-n-BUTYL SULFIDE	C8H18S	16900	16976.4	16989.9	16976.8
DI-n-BUTYL SULFONE	C8H18O2S	22228.3	22328.3	22128.1	22198.2
DIBUTYL TEREPHTHALATE	C16H22O4	19200.2	17817.3	18649	18454.6
DICHLOROACETALDEHYDE	C2H2Cl2O	21280.2	21071	20756.8	20903.4
DICHLOROACETIC ACID	C2H2Cl2O2	25774	27353.6	26211.3	26510.3
DICHLOROACETYL CHLORIDE	C2HCl3O	19583.9	19296.5	19121.7	19220.4
3,4-DICHLOROANILINE	C6H5Cl2N	24424.7	24302.3	23803.3	24015.1
m-DICHLOROBENZENE	C6H4Cl2	19943.3	20606.1	20470.1	20458.2
o-DICHLOROBENZENE	C6H4Cl2	20568.3	20177.7	20137.8	20192.8
p-DICHLOROBENZENE	C6H4Cl2	19238.1	19054.7	19065.6	19079.6
2,4-DICHLOROBENZOTRIFLUORIDE	C7H3Cl2F3	18196.9	18938.8	18636.8	18683.4
1,2-DICHLOROBUTANE	C4H8Cl2	18666.3	18491.7	18724.6	18648.9
1,4-DICHLOROBUTANE	C4H8Cl2	19794.9	20304.3	20650.6	20461.1
2,3-DICHLOROBUTANE	C4H8Cl2	17083.6	17760.1	17347.5	17444.9
(Z)-1,3-DICHLORO-2-BUTENE	C4H6Cl2	19251.8	19074.3	19261	19204.1
1,4-DICHLORO-cis-2-BUTENE	C4H6Cl2	19700.4	20200	20072.9	20073.8
1,4-DICHLORO-trans-2-BUTENE	C4H6Cl2	19865.2	20165.4	19817.6	19926.7
3,4-DICHLORO-1-BUTENE	C4H6Cl2	19373.7	19132.5	19081.4	19125.9
DICHLORODIETHYLSILANE	C4H10Cl2Si	17532.7	16696.1	17123.2	17036.1
DICHLORODIFLUOROMETHANE	CCl2F2	12373.8	12316.6	12455.8	12405.8
1,1-DICHLOROETHANE	C2H4Cl2	18663.6	17891.1	18148.1	18122.6
1,2-DICHLOROETHANE	C2H4Cl2	20245.3	20410.2	20194.8	20264.4
DI-(2-CHLOROETHOXY)METHANE	C5H10Cl2O2	20305.6	21008.3	20629.8	20710.9
1,1-DICHLOROETHYLENE	C2H2Cl2	17160.4	17665.3	17692.3	17631
cis-1,2-DICHLOROETHYLENE	C2H2Cl2	19542.4	19571.9	19483.6	19516
trans-1,2-DICHLOROETHYLENE	C2H2Cl2	16954	18134	18386.6	18167.5
DI(2-CHLOROETHYL)ETHER	C4H8Cl2O	20168.6	19472.7	20489.2	20152.2
1,1-DICHLORO-1-FLUOROETHANE	C2H3Cl2F	16220.6	16070.9	15944.7	16010.2
DICHLOROFLUOROMETHANE	CHCl2F	16629.8	16927.3	16546.3	16669
1,2-DICHLOROHEXAFLUOROCYCLOBUTANE	C4Cl2F6	14864	13539	13967.7	13928.7
1,3-DICHLOROHEXAFLUOROPROPANE	C3Cl2F6	13059.2	13401.3	13189.1	13239.8
DICHLOROMETHANE	CH2Cl2	19862.3	20411.7	20173.3	20213.7
1,5-DICHLOROPENTANE	C5H10Cl2	19931.6	20350.1	19694.6	19914.9
3,4-DICHLOROPHENYL ISOCYANATE	C7H3Cl2NO	21814.5	21571.4	21938.4	21815.9
1,1-DICHLOROPROPANE	C3H6Cl2	18155.6	18161.6	18272.1	18227.3
1,2-DICHLOROPROPANE	C3H6Cl2	18390.6	18465.7	18555.2	18511.9
1,3-DICHLOROPROPANE	C3H6Cl2	19494.8	19949.7	19663.1	19732.2
1,3-DICHLORO-2-PROPANOL	C3H6Cl2O	23935.9	23548.6	24264.1	24016.6
2,3-DICHLORO-1-PROPANOL	C3H6Cl2O	23781.4	24448.2	24150.3	24202.8
2,3-DICHLOROPROPENE	C3H4Cl2	18770.2	18769.8	18831.7	18807
cis-1,3-DICHLOROPROPENE	C3H4Cl2	19617.3	19739.2	19512.7	19591.1
trans-1,3-DICHLOROPROPENE	C3H4Cl2	20315.6	20242.3	20717.5	20534.7
DICHLOROSILANE	Cl2H2Si	16272.4	16032.8	15922.7	15990.7
1,1-DICHLOROTETRAFLUOROETHANE	C2Cl2F4	13958.8	12841.4	13634.1	13428.7
1,2-DICHLOROTETRAFLUOROETHANE	C2Cl2F4	13024.7	12570.2	12781.8	12742.6
2,4-DICHLOROTOLUENE	C7H6Cl2	19753.9	19813.9	19883.7	19849.8
1,2-DICHLORO-1,1,2-TRIFLUOROETHANE	C2HCl2F3	15621.9	14259.1	15139.4	14923.5
2,2-DICHLORO-1,1,1-TRIFLUOROETHANE	C2HCl2F3	15281.4	15752.5	15272.4	15417.3
2,2-DICHLORO-1,1,2-TRIFLUOROETHANE	C2HCl2F3	16142.8	15577.1	15763.5	15745.5
DICUMYL PEROXIDE	C18H22O2	16599.2	17334.4	17527.1	17376.5
1,4-DICYANO-2-BUTENE	C6H6N2	24990.3	25243.8	25291.3	25247
cis-DICYANO-1-BUTENE	C6H6N2	26721.1	24600.8	25362.9	25270.1
trans-DICYANO-1-BUTENE	C6H6N2	25676.3	27179.3	26438.5	26584.5
DICYCLOHEXYLAMINE	C12H23N	18237.4	17864.5	17971.6	17966.1
DICYCLOHEXYL SULFIDE	C12H22S	18234.9	17850.9	18395.5	18216.1
DICYCLOPENTADIENE	C10H12	18016.4	18041	17754.6	17866.7
DI-n-DECYL PHTHALATE	C28H46O4	17194	17050	16996.4	17032.2
DIETHANOLAMINE	C4H11NO2	28688.1	29678.8	29464.3	29451
1,2-DIETHOXYETHANE	C6H14O2	16612.7	16905	16561.5	16669.7
DIETHYLALUMINUM CHLORIDE	C4H10AlCl	20251.6	21810.6	21639	21551.7
DIETHYLAMINE	C4H11N	16702.4	16449.7	16483.3	16495.1
2,6-DIETHYLANILINE	C10H15N	19360.2	19199.3	19160.2	19192
m-DIETHYLBENZENE	C10H14	17467.1	17294.6	17178.5	17242.2
o-DIETHYLBENZENE	C10H14	17918.3	17849.6	17636.2	17728.4
p-DIETHYLBENZENE	C10H14	17701.8	17626.9	17485.3	17549.4
DIETHYL CARBONATE	C5H10O3	17802.4	18034.2	18060.9	18027
1,1-DIETHYLCYCLOHEXANE	C10H20	16484	16316.5	16428.5	16400.5
trans-1,4-DIETHYLCYCLOHEXANE	C10H20	16247.9	16323.7	16474.5	16406.6
DIETHYL DISULFIDE	C4H10S2	20447.2	19187	20075.3	19846
DIETHYLENE GLYCOL	C4H10O3	28426.4	28990.3	28480.6	28628.1
DIETHYLENE GLYCOL DI-n-BUTYL ETHER	C12H26O3	16237.9	16143.6	16282	16236.1
DIETHYLENE GLYCOL DIETHYL ETHER	C8H18O3	17222	16569.8	16469.2	16574.7
DIETHYLENE GLYCOL DIMETHYL ETHER	C6H14O3	18817.2	18747.1	19107	18970.1
DIETHYLENE GLYCOL ETHYL ETHER ACETATE	C8H16O4	19275.5	19244.5	19368.5	19322
DIETHYLENE GLYCOL MONOPROPYL ETHER	C7H16O3	19929.3	20537.8	20013.3	20162.2
DIETHYLENETRIAMINE	C4H13N3	22573.8	22749.2	22358.1	22497
DIETHYLETHANOLAMINE	C6H15NO	19459.7	19131	18996.5	19083.2
DIETHYL ETHER	C4H10O	15853.2	15293.8	15939	15736.9
DI(2-ETHYLHEXYL)ADIPATE	C22H42O4	16672.9	17023.7	16763.6	16832.6
DI-2-ETHYLHEXYLAMINE	C16H35N	16727.1	16634.5	16767.1	16723.3
DI-(2-ETHYLHEXYL) MALEATE	C20H36O4	17093.5	16709.5	16710.2	16748.3
DI(2-ETHYLHEXYL)TEREPHTHALATE	C24H38O4	18678.5	19072.7	19223	19123.5
DIETHYL MALEATE	C8H12O4	17960.3	17998.1	18141.5	18080.4
DIETHYL MALONATE	C7H12O4	18760.8	19003.6	19124.4	19051.8
2,6-DIETHYLNAPHTHALENE	C14H16	18937.3	19095.8	19194.2	19139
DIETHYL OXALATE	C6H10O4	20075.4	20205.9	20250.9	20219.9
3,3-DIETHYLPENTANE	C9H20	15269.1	15526.6	15340	15388.9
DIETHYL PHTHALATE	C12H14O4	19658.6	19651.5	19974	19845.8
DIETHYL SUCCINATE	C8H14O4	18311.2	18636.5	18972	18805.3
DIETHYL SULFATE	C4H10O4S	21109.7	20489.9	20464.6	20536.7
DIETHYL SULFIDE	C4H10S	17602.5	17292.5	17393.2	17383.9
DIETHYLSULFITE	C4H10O3S	19414	19706.1	19906	19796.8
1,2-DIFLUOROBENZENE	C6H4F2	18937.8	18461.7	18052.2	18263.6
1,3-DIFLUOROBENZENE	C6H4F2	17986.5	17912.7	17763.6	17830.6
1,4-DIFLUOROBENZENE	C6H4F2	18323.5	18539.4	18207.3	18318.6
1,1-DIFLUOROETHANE	C2H4F2	15266.6	15153.7	15565.5	15412.1
1,2-DIFLUOROETHANE	C2H4F2	18425.4	17753.7	18075.1	18013.7
1,1-DIFLUOROETHYLENE	C2H2F2	7057.58	4078.73	4574.02	4673.79
DIFLUOROMETHANE	CH2F2	17567.6	14955.8	15109.2	15309
2-(DIFLUOROMETHOXY)-1,1,1-TRIFLUOROETHANE	C3H3F5O	14921.2	14985.6	14984.6	14978.6
DIFLUOROMETHYL METHYL ETHER	C2H4F2O	18679.8	17658.1	19696.7	18983.4
DIFLUOROMETHYL TRIFLUOROMETHYL ETHER	C2HF5O	11547.4	11318.2	11011.5	11157.1
DIGLYCOLIC ACID	C4H6O5	29387.3	30481.7	30755.2	30536.3
DI-n-HEPTYL PHTHALATE	C22H34O4	17938.3	18037.8	18010.5	18011.5
DIHEXYL ADIPATE	C18H34O4	17727.4	17166.1	17413.6	17370.7
DI-n-HEXYL ETHER	C12H26O	16523.3	16193.7	16387.5	16342.9
DI-n-HEXYL PHTHALATE	C20H30O4	17778.9	17850.5	17846.9	17841.2
2,3-DIHYDROFURAN	C4H6O	18895.1	18931.6	19261.5	19125.9
2,5-DIHYDROFURAN	C4H6O	19512.1	19513.9	19806	19689
DIIODOMETHANE	CH2I2	23923	24490	24275.5	24304.6
DIISOBUTYLALUMINUM CHLORIDE	C8H18AlCl	18555.2	19187.7	19254.2	19164.3
DIISOBUTYLAMINE	C8H19N	16219.3	15812.4	16443.8	16231.9
DIISOBUTYL ETHER	C8H18O	14876.9	14865.1	14968	14928
DIISOBUTYL KETONE	C9H18O	17150.3	16717.4	16700.3	16750.4
DIISONONYL PHTHALATE	C26H42O4	16589.9	16460.2	16422	16450.2
DIISOOCTYL PHTHALATE	C24H38O4	18247.7	18033.2	18360.8	18251.2
DIISOPENTYLSULFIDE	C10H22S	16759.9	16514.5	16820.7	16722.7
DIISOPROPANOLAMINE	C6H15NO2	25429.8	26312.1	26252.4	26188.1
DIISOPROPYLAMINE	C6H15N	15154.1	15335.5	15092.8	15171.8
m-DIISOPROPYLBENZENE	C12H18	16814.1	16542.1	16983	16833.8
p-DIISOPROPYLBENZENE	C12H18	16841.5	16725.4	16856	16815.4
p-DIISOPROPYLBENZENE HYDROPEROXIDE	C12H18O2	21022.5	21163.4	20781	20919.9
4,4'-DIISOPROPYLBIPHENYL	C18H22	18175	17377.6	17577.5	17577.3
DIISOPROPYL ETHER	C6H14O	14760.2	14769.3	14622.1	14680.1
DIISOPROPYL KETONE	C7H14O	17066.6	17201.6	16983.4	17057.2
DIISOPROPYL SULFIDE	C6H14S	16429.6	16127.6	16215	16210.2
3,5-DIISOPROPYLTOLUENE	C13H20	16714.4	16040.8	16229	16221.1
DIKETENE	C4H4O2	23127	22638.9	23037	22926.6
DILACTIC ACID	C6H10O5	19880.5	19856.3	20018.7	19956.2
DILACTIDE (dl)	C6H8O4	25530.8	25881	25855.7	25830.8
DIMERCAPTOETHYL ETHER	C4H10OS2	21948.2	21739.1	21444.8	21583.4
1,1-DIMETHOXYETHANE	C4H10O2	16275.2	16411.4	16443.4	16417
1,2-DIMETHOXYETHANE	C4H10O2	17964.6	17914.6	17959	17946.2
1,2-DIMETHOXYPROPANE	C5H12O2	16974	16997.9	16903.5	16938.9
trans-3,5-DIMETHOXYSTILBENE	C16H16O2	21037.5	21176.4	21196.7	21174.7
DIMETHYLACETYLENE	C4H6	18082.2	17446.9	17442.5	17507.8
1,3-DIMETHYLADAMANTANE	C12H20	16102	16172.6	16178.8	16169.3
DIMETHYLAMINE	C2H7N	17490.7	16516.6	16953.1	16875.9
p-DIMETHYLAMINOBENZALDEHYDE	C9H11NO	22716.8	22225.8	21947.2	22107.8
2,4-DIMETHYLANILINE	C8H11N	21221.6	21231.5	21276.8	21257.7
3,5-DIMETHYLBENZOFURAN	C10H10O	19584.7	19558.6	19883	19755.8
2,3-DIMETHYLBENZOTHIOPHENE	C10H10S	20862.8	20372.8	20937.4	20760.5
2,7-DIMETHYLBENZOTHIOPHENE	C10H10S	19813.8	18976.7	19591.3	19429.2
3,5-DIMETHYLBENZOTHIOPHENE	C10H10S	20272.6	20475.4	20614.1	20538.3
2,3-DIMETHYL-1,3-BUTADIENE	C6H10	16305.2	15887	15837.2	15899
2,2-DIMETHYLBUTANE	C6H14	13821.7	13728.1	13718.7	13731.8
2,3-DIMETHYLBUTANE	C6H14	14459.4	14044.7	14193.3	14175.3
3,3-DIMETHYL-2-BUTANONE	C6H12O	17437.5	17078.2	17085	17118.2
2,3-DIMETHYL-1-BUTENE	C6H12	14593.9	14811.3	14727.4	14739.2
2,3-DIMETHYL-2-BUTENE	C6H12	15777.3	15816.2	15598.7	15681.8
3,3-DIMETHYL-1-BUTENE	C6H12	13839	13600.7	13831.4	13762.9
3,3-DIMETHYL-1-BUTYNE	C6H10	14188.8	13915.1	13918.2	13944.3
DIMETHYL CARBONATE	C3H6O3	19984.6	20122.5	19804.5	19917.9
DIMETHYLCHLOROSILANE	C2H7ClSi	15643.4	15440.1	15619	15567.8
1,1-DIMETHYLCYCLOHEXANE	C8H16	15766.5	15860	15793.2	15810.5
cis-1,2-DIMETHYLCYCLOHEXANE	C8H16	16251.7	16588.6	16458.8	16477
cis-1,3-DIMETHYLCYCLOHEXANE	C8H16	15606.8	15833.7	15737.8	15753.5
cis-1,4-DIMETHYLCYCLOHEXANE	C8H16	15900.2	15774	15747.3	15770.6
trans-1,2-DIMETHYLCYCLOHEXANE	C8H16	15826	15909.8	15770.3	15817.8
trans-1,3-DIMETHYLCYCLOHEXANE	C8H16	15951.1	16081.1	15650.9	15810
trans-1,4-DIMETHYLCYCLOHEXANE	C8H16	15504	15322.1	15515.4	15456.2
DIMETHYL-1,4-CYCLOHEXANEDICARBOXYLATE	C10H16O4	19569.3	19300.6	19787.4	19619.6
1,1-DIMETHYLCYCLOPENTANE	C7H14	15498	15390.7	15188.9	15280.3
cis-1,2-DIMETHYLCYCLOPENTANE	C7H14	16053.5	15711.7	16099.1	15978.3
cis-1,3-DIMETHYLCYCLOPENTANE	C7H14	15420	15394.1	15347.9	15369
trans-1,2-DIMETHYLCYCLOPENTANE	C7H14	15557.1	15467.8	15377.8	15422.7
trans-1,3-DIMETHYLCYCLOPENTANE	C7H14	15526.5	15406	15357.7	15389.1
2,3-DIMETHYLDECANE	C12H26	15481.3	15822.2	15762.2	15752.1
4,6-DIMETHYLDIBENZOTHIOPHENE	C14H12S	20287.7	20609.6	20572.5	20555.2
DIMETHYLDICHLOROSILANE	C2H6Cl2Si	15909.8	15826.2	15879.2	15866.3
DIMETHYLDIMETHOXYSILANE	C4H12O2Si	15202.4	15117	15046.3	15083.1
2,4-DIMETHYL-1,3-DIOXOLANE-2-METHANOL	C6H12O3	21053.6	20887	20772.9	20835.2
2,3-DIMETHYL-2,3-DIPHENYLBUTANE	C18H22	17598.8	16993	16814.7	16946.6
DIMETHYL DISULFIDE	C2H6S2	19973.9	20211.6	19935.7	20022.3
2,3-DIMETHYLDODECANE	C14H30	15756.2	15858.2	15891.1	15867.7
DIMETHYLETHANOLAMINE	C4H11NO	20604.5	20507.4	20218.5	20343.8
DIMETHYL ETHER	C2H6O	14722.1	15045.4	15066.9	15026
2,2-DIMETHYL-3-ETHYLPENTANE	C9H20	15113.9	15421.3	15673.4	15541.8
2,4-DIMETHYL-3-ETHYLPENTANE	C9H20	15027.2	15238.9	15232.6	15213.9
DIMETHYL GLUTARATE	C7H12O4	20251.6	20966.2	20822.9	20808.8
2,2-DIMETHYLHEPTANE	C9H20	14818.5	14476.5	14613.9	14593.1
2,3-DIMETHYLHEPTANE	C9H20	15272.1	14951	15053.4	15044.5
2,6-DIMETHYLHEPTANE	C9H20	15120.8	14459.2	14544.8	14576.8
2,6-DIMETHYL-4-HEPTANOL	C9H20O	17939.4	17625.4	17734.9	17722.5
2,5-DIMETHYL-1,5-HEXADIENE	C8H14	15619.2	15393.8	15601.8	15541.2
2,5-DIMETHYL-2,4-HEXADIENE	C8H14	16778.8	16563.5	16581.9	16596
2,2-DIMETHYLHEXANE	C8H18	14827.1	14473.2	14647.9	14613.4
2,3-DIMETHYLHEXANE	C8H18	15044.8	14706.3	14778.7	14783.5
2,4-DIMETHYLHEXANE	C8H18	14641.4	14719.8	14720.5	14712.4
2,5-DIMETHYLHEXANE	C8H18	14716.2	14552.1	14571.5	14580.2
3,3-DIMETHYLHEXANE	C8H18	14889.5	14763.3	14774.4	14782.6
3,4-DIMETHYLHEXANE	C8H18	15183.7	15294.3	15173.4	15210.7
2,3-DIMETHYL-1-HEXENE	C8H16	15169.4	14950.6	15008	15006.9
1,3-DIMETHYL-2-IMIDAZOLIDINONE	C5H10N2O	23638.7	22360.3	22809.5	22757.7
1,6-DIMETHYLINDAN	C11H14	17712.9	18410	17787.2	17966.6
DIMETHYL ISOPHTHALATE	C10H10O4	20389	20474.7	21129.4	20859
DIMETHYLKETENE	C4H6O	16323.4	16372.6	16191.6	16259.1
DIMETHYL MALEATE	C6H8O4	21190.4	22680.4	22471.9	22406.3
DIMETHYLMALONATE	C5H8O4	20484.4	21930.6	21139.7	21311.4
DIMETHYLMERCURY	C2H6Hg	20361	20504.3	20867.9	20708.1
DIMETHYL-2,6-NAPHTHALENEDICARBOXYLATE	C14H12O4	18805.2	19175.6	19268.2	19194.1
1,3-DIMETHYL-5-NITROBENZENE	C8H9NO2	22711.7	21960.2	21875.1	21984.3
2,3-DIMETHYLNONANE	C11H24	15330.1	15466.8	15525.5	15488.3
2,2-DIMETHYLOCTANE	C10H22	15129	14778.9	14956.9	14920.7
2,3-DIMETHYLOCTANE	C10H22	15403.3	15564.6	15388.9	15443.1
2,4-DIMETHYLOCTANE	C10H22	15068.3	14954.7	14989.2	14986.8
2,5-DIMETHYLOCTANE	C10H22	15128	15043.5	15010	15031.8
2,6-DIMETHYLOCTANE	C10H22	15175.2	14860.2	14918	14926.4
2,7-DIMETHYLOCTANE	C10H22	15165.5	14464.3	14906.9	14800
2,2-DIMETHYLPENTANE	C7H16	14381.9	14524.2	14587	14547.7
2,3-DIMETHYLPENTANE	C7H16	14747.4	14635.4	14740.8	14709.9
2,4-DIMETHYLPENTANE	C7H16	14413.4	14525.6	14635.9	14580.6
3,3-DIMETHYLPENTANE	C7H16	14593.3	14598.5	14624.3	14613.5
DIMETHYL PHTHALATE	C10H10O4	20807.1	21072.1	21106.8	21066.4
2,2-DIMETHYL-1-PROPANOL	C5H12O	19063.1	18704.4	18797.2	18795.9
1,2-DIMETHYL-3-PROPYLBENZENE	C11H16	17821.5	18005.4	18033.7	18004
2,6-DIMETHYLPYRIDINE	C7H9N	19436.8	18541.8	18818.7	18797.4
DIMETHYL SUCCINATE	C6H10O4	20689.1	20863.8	21310.3	21114.2
DIMETHYL SULFATE	C2H6O4S	23061.5	22166.4	22369.1	22377.6
DIMETHYL SULFIDE	C2H6S	18611.8	18256.8	18562.4	18475.7
DIMETHYL SULFOXIDE	C2H6OS	27142.4	26534.8	26887	26806.9
DIMETHYL TEREPHTHALATE	C10H10O4	18855.6	18483.4	18411.2	18477.3
2,5-DIMETHYLTETRAHYDROFURAN	C6H12O	16769.6	16363.7	16573.2	16530
2,3-DIMETHYLTHIOPHENE	C6H8S	18894.3	18450.4	18457	18498.8
2,5-DIMETHYLTHIOPHENE	C6H8S	18440.7	18599.5	18661.4	18620.8
3,4-DIMETHYLTHIOPHENE	C6H8S	19178.3	19281.9	19311	19289
2,3-DIMETHYLUNDECANE	C13H28	15641.7	16210.4	15964.2	16005.8
1,3-DIMETHYL UREA	C3H8N2O	26943	26119.9	25972.2	26113.6
p-DINITROBENZENE	C6H4N2O4	21980.6	21002.9	20944.5	21065.6
2,4-DINITROPHENOL	C6H4N2O5	24348.7	24085.5	24314.9	24249.4
2,6-DINITROPHENOL	C6H4N2O5	25883.3	26845.5	26606.4	26605.8
4,6-DINITRO-o-sec-BUTYLPHENOL	C10H12N2O5	22277.5	23086.2	23010.2	22959.7
2,4-DINITROTOLUENE	C7H6N2O4	22583.5	22511.7	22532.9	22531.6
2,5-DINITROTOLUENE	C7H6N2O4	22462.9	22422	22369.2	22394.4
2,6-DINITROTOLUENE	C7H6N2O4	22283.4	21533.7	21753.1	21740.4
3,4-DINITROTOLUENE	C7H6N2O4	22692	21532.8	21709.6	21754.8
3,5-DINITROTOLUENE	C7H6N2O4	22622.1	22654.2	20888.4	21591.5
DINONYLPHENOL	C24H42O	19187.9	20098.9	19714.8	19777.3
DI-n-NONYL PHTHALATE	C26H42O4	17015.2	17147.6	16846.7	16953.8
DIOCTYL ADIPATE	C22H42O4	16824.8	16927.3	16947.8	16929.3
DI-n-OCTYLAMINE	C16H35N	16392	16346.3	16297.6	16321.7
DI-n-OCTYL ETHER	C16H34O	16892.6	16397.3	16645.9	16596
DIOCTYL PHTHALATE	C24H38O4	17735.3	17346.1	17086.2	17229.1
DI-n-OCTYL SULFIDE	C16H34S	17479.4	17660.7	17674.3	17650.7
DI-n-OCTYL TEREPHTHALATE	C24H38O4	17650.7	17638.2	17748.9	17705.9
DIOLEIN	C39H72O5	16475.7	16105.3	16659.3	16474.7
1,3-DIOXANE	C4H8O2	20591.6	20906.1	20442.9	20596.7
1,4-DIOXANE	C4H8O2	17381	19122.8	18524.3	18589.5
DI-n-PENTYL ETHER	C10H22O	16572.8	16050	16305.7	16255.7
DIPHENYL CARBONATE	C13H10O3	19534.7	19311.8	19342.1	19352.2
DIPHENYLDICHLOROSILANE	C12H10Cl2Si	19404.4	19236.2	19230.8	19249.8
DIPHENYL DISULFIDE	C12H10S2	19577.7	18604.7	18203.6	18461.3
1,1-DIPHENYLETHANE	C14H14	19014.6	19084.1	19282.6	19196.2
1,2-DIPHENYLETHANE	C14H14	19166.3	19155.8	18990.2	19057.5
DIPHENYL ETHER	C12H10O	19443.9	19440.7	19267.5	19337.1
DIPHENYLMETHANE	C13H12	19548.1	19738.6	19373.8	19500.7
2,4-DIPHENYL-4-METHYLPENTENE-1	C18H20	18273.5	18706.3	18126.7	18315.3
2,2-DIPHENYL PROPANE	C15H16	19300.7	19287.8	18900.5	19056.7
1,3-DIPHENYLTRIAZENE	C12H11N3	19880.9	20137.5	19583.5	19779.4
DI-n-PROPYLAMINE	C6H15N	16313.9	16383.4	16756.4	16600.3
DI-n-PROPYL DISULFIDE	C6H14S2	17720.8	18090.5	17807.1	17883.5
DIPROPYLENE GLYCOL MONOETHYL ETHER	C8H18O3	17851.4	18212.4	17908.1	17993.7
DIPROPYLENE GLYCOL MONOMETHYL ETHER	C7H16O3	18173.7	18250.8	18408.6	18337.8
DIPROPYLENE GLYCOL MONOMETHYL ETHER ACETATE	C9H18O4	17532	17286.4	17311.3	17325.9
DIPROPYLENE GLYCOL n-BUTYL ETHER	C10H22O3	17490.3	17615.8	17517.9	17544.5
DIPROPYLENE GLYCOL n-PROPYL ETHER	C9H20O3	18068.2	16970	17144.4	17184.5
DIPROPYLENE GLYCOL t-BUTYL ETHER	C10H22O3	18196.4	18245.7	18337	18295.5
DI-n-PROPYL ETHER	C6H14O	15550.5	15657.4	15326.2	15448
DIPROPYL MALEATE	C10H16O4	19921.1	19983	19721.1	19819.7
DI-n-PROPYL PHTHALATE	C14H18O4	18900.2	18925.3	19010.9	18974.2
DI-n-PROPYL SULFIDE	C6H14S	17465.3	17634.7	17494.3	17533.5
DI-n-PROPYL SULFONE	C6H14O2S	22547.1	22679.7	22373.5	22482.7
DI-sec-BUTYL ETHER	C8H18O	14996	15202	15098.8	15119.5
DISILANE	H6Si2	16109.7	13106.4	13900.6	13883.3
DI-tert-BUTYL DISULFIDE	C8H18S2	17404.2	16441	17123	16946.5
DI-tert-BUTYL ETHER	C8H18O	14609.9	14506.9	14395.2	14450.2
DI-tert-BUTYL SULFIDE	C8H18S	16142.9	15592.2	15570.5	15634.3
DI-n-UNDECYL PHTHALATE	C30H50O4	16732.3	16156.6	16816	16609.8
m-DIVINYLBENZENE	C10H10	18893.9	18499.8	18708.7	18664.6
p-DIVINYLBENZENE	C10H10	18445.5	18878.3	18772.4	18771.5
n-DOCOSANE	C22H46	15830.9	16264.5	15817.4	15952.9
1-DOCOSANOL	C22H46O	16638.2	16808.7	16906.5	16850.3
1-DOCOSENE	C22H44	15852.7	15968.2	15941.9	15940.9
DODECAMETHYLCYCLOHEXASILOXANE	C12H36O6Si6	13131.4	11982.9	12175.6	12213.4
DODECAMETHYLPENTASILOXANE	C12H36O4Si5	11854.4	12084.8	11932.9	11970.7
DODECANAL	C12H24O	19074.4	19248.6	19343.1	19287.9
n-DODECANE	C12H26	15886	15438.6	15473.2	15504.1
DODECANEDIOIC ACID	C12H22O4	20310.5	20777	19680.4	20072.4
n-DODECANOIC ACID	C12H24O2	19501.1	19829.3	19732.7	19738.5
1-DODECANOL	C12H26O	19470.2	19734.3	19582.2	19616.6
1-DODECENE	C12H24	15871.1	16088.3	15775.3	15878.8
cis-2-DODECENE	C12H24	16092.5	15810.5	15937.6	15915
trans-2-DODECENE	C12H24	16122.7	16264	16176.8	16197.5
n-DODECYLBENZENE	C18H30	16994.3	17234.8	17072	17113
n-DODECYL MERCAPTAN	C12H26S	17449.2	17472.9	17422.2	17440.1
n-DOTRIACONTANE	C32H66	15480.2	14600.9	15297.9	15107
EICOSAMETHYLNONASILOXANE	C20H60O8Si9	11508.8	11810.4	11403.8	11536.3
n-EICOSANE	C20H42	16000.1	15731.3	15925.7	15874.8
n-EICOSANIC ACID	C20H40O2	17293.4	17943.6	17929.2	17869.9
1-EICOSANOL	C20H42O	17273.5	17620.8	17427.7	17470.2
1-EICOSENE	C20H40	16277.3	16428.2	16326.7	16352.2
trans-2-EICOSENE	C20H40	16223.9	16329.1	15818	16011.9
alpha-EPICHLOROHYDRIN	C3H5ClO	23046.8	22533.2	22540.3	22588.8
1,2-EPOXYBUTANE	C4H8O	17623.4	18274.1	18331.3	18243.3
1,2-EPOXY-2-METHYLPROPANE	C4H8O	18093.4	17387.5	18462.3	18103
1,2-EPOXY-3-PHENOXYPROPANE	C9H10O2	22211.6	22632	22170.4	22313
2,3-EPOXY-1-PROPANOL	C3H6O2	26749.8	27396.1	26856.1	27007.5
[3-(2,3-EPOXYPROXY)PROPYL]TRIMETHOXYSILANE	C9H20O5Si	18088.3	17901.3	17286.8	17551.3
ERUCIC ACID	C22H42O2	17102.5	17808.3	17626.8	17628.8
ETHANE	C2H6	8393.32	6332.03	4136.05	5220.57
1,2-ETHANEDITHIOL	C2H6S2	21626.3	22024.4	21774.7	21834.8
ETHANESULFONYL CHLORIDE	C2H5ClO2S	23075	22716.5	22525.3	22637.6
ETHANOL	C2H6O	25076.7	26068.9	25804.3	25810.9
2-(2-ETHOXYETHOXY)ETHANOL	C6H14O3	20776.8	20864.6	20574.3	20681.6
2-ETHOXYETHYL ACETATE	C6H12O3	19392.4	18856.7	18942.9	18962
1-ETHOXY-2-PROPANOL	C5H12O2	19039.1	19357.3	19332.6	19310.7
2-ETHOXY-1-PROPANOL	C5H12O2	18863.9	19516.6	18923.2	19095.3
ETHYL ACETATE	C4H8O2	18270.3	18319.3	18184.9	18233.8
ETHYL ACETOACETATE	C6H10O3	20333	20378.2	20309.1	20332.2
ETHYLACETYLENE	C4H6	15880.6	15910	15913	15908.9
ETHYL ACRYLATE	C5H8O2	18233.6	19170.1	18593.4	18730.5
ETHYLAL	C5H12O2	15523	16166.7	16195.2	16119.4
ETHYLAMINE	C2H7N	18756.9	18718.5	18776.5	18757.1
N-ETHYLANILINE	C8H11N	20331.4	20721.6	20643	20635.4
o-ETHYLANILINE	C8H11N	20811.3	21234.6	20702.8	20873.2
ETHYLBENZENE	C8H10	18111.1	18281.3	17969.3	18077.1
ETHYLBENZENE HYDROPEROXIDE	C8H10O2	24631.4	24910.5	25069.6	24978.1
ETHYL BENZOATE	C9H10O2	19738.3	20212.9	19831.4	19936.5
2-ETHYLBENZOTHIOPHENE	C10H10S	20355.3	20013.6	20012	20046.8
3-ETHYLBENZOTHIOPHENE	C10H10S	20065.1	19886.3	20294.1	20148.9
2-ETHYL-1-BUTANOL	C6H14O	19563.3	19601.7	20208.3	19961.8
2-ETHYL-1-BUTENE	C6H12	15209.3	15247.7	15285.9	15266.8
2-ETHYL BUTYRIC ACID	C6H12O2	21195.7	21286.6	21410	21351.6
ETHYL CAPRATE	C12H24O2	17278.2	17048	17445.2	17309.4
ETHYL CAPRYLATE	C10H20O2	17033.3	16779.2	16904.1	16879.6
ETHYL CHLORIDE	C2H5Cl	16674.2	16917.8	17167.5	17043.3
ETHYLCHLOROACETATE	C4H7ClO2	20311.7	20895.5	20151.3	20390.6
ETHYL CHLOROFORMATE	C3H5ClO2	18673.6	18779.3	18199.3	18420.7
ETHYL CYANOACETATE	C5H7NO2	24160.9	24782	24279.6	24418.4
ETHYLCYCLOHEXANE	C8H16	16281.4	16853.3	16418.4	16535.2
1-ETHYLCYCLOHEXENE	C8H14	17061.6	17165.7	17047.1	17084.2
ETHYLCYCLOPENTANE	C7H14	15533.9	15633.7	15675.5	15648.8
1-ETHYL-DECALIN	C12H22	16900.7	17117.4	16903.6	16967.4
ETHYLDIETHANOLAMINE	C6H15NO2	22790.5	23663.9	23901.1	23718.9
3-ETHYL-2,5-DIMETHYLTHIOPHENE	C8H12S	18921.7	18866.9	18680.1	18760.3
3-ETHYLDODECANE	C14H30	15113.7	14975.6	15087.1	15056.3
ETHYLENE	C2H4	15119.2	16118	15740.5	15791.6
ETHYLENE CARBONATE	C3H4O3	29769.7	29933.8	29569.8	29699
ETHYLENEDIAMINE	C2H8N2	24598.7	24945.9	25158.4	25038.7
ETHYLENE GLYCOL	C2H6O2	32448.9	33750	33520.6	33482.3
ETHYLENE GLYCOL DIACETATE	C6H10O4	20381.3	21092.6	20794.8	20842.8
ETHYLENE GLYCOL DIACRYLATE	C8H10O4	19714.1	19741	19944.8	19860.6
ETHYLENE GLYCOL DINITRATE	C2H4N2O6	23913.8	25783.6	24671.2	24929.2
ETHYLENE GLYCOL MONOBUTYL ETHER ACETATE	C8H16O3	17819	18259.4	18059.1	18095.2
ETHYLENE GLYCOL MONOPROPYL ETHER	C5H12O2	20366	20704.6	20676.8	20654
ETHYLENEIMINE	C2H5N	23639	24463.9	24374	24327.5
ETHYLENE OXIDE	C2H4O	20841.2	21161	21081.7	21081.4
ETHYL ERUCATE	C24H46O2	16276.4	16309.9	16467.4	16401.1
ETHYL-3-ETHOXYPROPIONATE	C7H14O3	17752.9	17948.4	17564.1	17698.3
ETHYL FLUORIDE	C2H5F	14103.4	14575.6	14445.3	14450.2
ETHYL FORMATE	C3H6O2	18710.8	18694.1	19023.8	18893.6
3-ETHYL HEPTANAL	C9H18O	17847	16509.3	17416.2	17187.2
3-ETHYLHEPTANE	C9H20	15251.1	15049.7	15053.4	15072
3-ETHYL-1-HEPTANOL	C9H20O	19393.6	19385.2	19589.2	19508.4
2-ETHYLHEXANAL	C8H16O	17511.8	17360.6	17462	17436.5
3-ETHYLHEXANE	C8H18	15152	15059.7	14966.5	15013
2-ETHYL HEXANOIC ACID	C8H16O2	19657.7	20934.7	20745	20693.2
2-ETHYL-1-HEXANOL	C8H18O	18738.6	18749.8	18737.5	18741.3
2-ETHYL-2-HEXENAL	C8H14O	19434.3	19496.7	19187	19304.6
2-ETHYL-1-HEXENE	C8H16	15393.5	15347	15418.5	15394.5
3-ETHYL-1-HEXENE	C8H16	15118.8	14964.8	15000.5	15001.6
2-ETHYLHEXYL ACETATE	C10H20O2	16725.2	16578	16405.3	16489.1
2-ETHYLHEXYL ACRYLATE	C11H20O2	16511.5	16659.9	16534.9	16570.1
2-ETHYLHEXYL BENZOATE	C15H22O2	17531.7	17740.5	17368.3	17496.3
ETHYL HYDROGEN SULFATE	C2H6O4S	28084.5	27565.9	27887.4	27810.6
ETHYL HYDROPEROXIDE	C2H6O2	21596.6	22186.5	21395.1	21652.7
ETHYLIDENE DIACETATE	C6H10O4	19555.7	19325.7	19410.5	19399.6
5-ETHYLIDENE-2-NORBORNENE	C9H12	17618.4	17556.7	17759.4	17684.5
ETHYL IODIDE	C2H5I	19210.8	18819.5	18877.7	18893.6
ETHYL ISOAMYL KETONE	C8H16O	18032.3	17600.1	17682.7	17692.9
ETHYL ISOBUTYL ETHER	C6H14O	15438.7	15226.4	15158.2	15206.7
ETHYL ISOBUTYRATE	C6H12O2	16772	16554.7	16476.5	16529.5
ETHYL ISOPROPYL ETHER	C5H12O	15249.9	14623.4	14784.3	14782.6
ETHYL ISOPROPYL KETONE	C6H12O	18475	18645.5	19215.5	18970.4
ETHYL ISOVALERATE	C7H14O2	16646.4	16472.8	16348.7	16415.7
ETHYL LACTATE	C5H10O3	20565.4	20462.9	20246.8	20343.5
ETHYL LAURATE	C14H28O2	17430.6	17369.6	17361.9	17371
ETHYL LEVULINATE	C7H12O3	20564.7	21121	21014.2	21001.3
ETHYL LINOLEATE	C20H36O2	16568.6	16424.8	16369.5	16406
ETHYL LINOLENATE	C20H34O2	16844.6	16554.3	16472.6	16534.3
ETHYL MERCAPTAN	C2H6S	18243.4	18314.3	18114.1	18187.1
ETHYL METHACRYLATE	C6H10O2	17488.2	17659.8	17337	17449
N-ETHYL-2-METHYLALLYLAMINE	C6H13N	16974.2	16439.2	16651.3	16620
ETHYL METHYL DISULFIDE	C3H8S2	18772.1	19124.3	18890.5	18948.8
N-ETHYLMORPHOLINE	C6H13NO	18051.9	18435.9	18389.7	18369.8
ETHYL MYRISTATE	C16H32O2	17224	16914.7	16945.5	16964.1
1-ETHYLNAPHTHALENE	C12H12	19833.4	19596.8	19689	19675.8
2-ETHYLNAPHTHALENE	C12H12	19655.1	19235	19462.2	19413.3
ETHYL n-BUTYRATE	C6H12O2	17248.6	16957	17155.9	17105.5
ETHYL n-HEXYL ETHER	C8H18O	16188.9	15886.1	16552.8	16316.4
ETHYL n-OCTYL SULFIDE	C10H22S	17401.1	17087.1	17029.6	17084
ETHYLNORBORNENE	C9H14	17043	17101.8	16992.4	17030.3
ETHYL n-PENTYL SULFIDE	C7H16S	17016.4	17414.3	16985.6	17117.3
ETHYL OLEATE	C20H38O2	16110.2	15939.4	16109.7	16058.7
ETHYL PALMITATE	C18H36O2	16895.4	16910.6	17072	17005.9
3-ETHYLPENTANE	C7H16	14934.6	14836.2	14901.9	14885.5
2-ETHYL-1-PENTENE	C7H14	15365	15269.1	15197.6	15235.8
3-ETHYL-1-PENTENE	C7H14	14958	15126.8	15023.2	15047.7
m-ETHYLPHENOL	C8H10O	22748.2	23170.1	22556.5	22759.8
o-ETHYLPHENOL	C8H10O	22268.6	22291	21755	21967.2
p-ETHYLPHENOL	C8H10O	21801.8	21721	21955.8	21870
ETHYL PHENYL CARBONATE	C9H10O3	19858.8	19062.9	18898.5	19043.8
1-(4-ETHYLPHENYL)-2-(4-ETHYLPHENYL)ETHANE	C18H22	15522.5	17097.8	16949	16851
1-(4-ETHYLPHENYL)-2-PHENYLETHANE	C16H18	19024.5	18383.6	18536.6	18539.5
ETHYL PROPIONATE	C5H10O2	17859.8	17891.2	17754.1	17805.8
ETHYL PROPYL DISULFIDE	C5H12S2	17721.1	18189.7	18106	18092.6
ETHYL PROPYL ETHER	C5H12O	15535.2	15454.8	15375.9	15415.5
ETHYL PROPYL SULFIDE	C5H12S	17369.9	17144.5	17477.6	17366.9
N-ETHYL-2-PYRROLIDONE	C6H11NO	22153.7	22006.1	22666.1	22416.9
ETHYL STEARATE	C20H40O2	16460.9	16481	16192.4	16305.8
m-ETHYLSTYRENE	C10H12	18380.5	18086.7	18180.6	18172.4
o-ETHYLSTYRENE	C10H12	18401.7	18155.6	18371.2	18309.5
p-ETHYLSTYRENE	C10H12	18573.6	18400.3	18675.9	18583
ETHYL t-BUTYL SULFIDE	C6H14S	16286	16065.7	16312	16235.5
ETHYL TERT-BUTYL DISULFIDE	C6H14S2	17002	17199.7	17123.8	17134.4
ETHYL tert-PENTYL ETHER	C7H16O	14951.8	14977.4	14979.7	14976.2
2-ETHYL-TETRAHYDROTHIOPHENE	C6H12S	19292.4	19150	19498.3	19373.2
1-ETHYLTETRALIN	C12H16	18497.7	18727.7	18877.1	18794.3
ETHYLTHIOETHANOL	C4H10OS	22312	22405.6	22649.4	22542.5
ETHYL THIOLACETATE	C4H8OS	19135.9	18670.8	18466.1	18594.5
2-ETHYLTHIOPHENE	C6H8S	18629.1	18908.4	18870.5	18857.7
m-ETHYLTOLUENE	C9H12	17642.4	17653.6	17560.3	17596.5
o-ETHYLTOLUENE	C9H12	18129.2	18112.6	18057.1	18081
p-ETHYLTOLUENE	C9H12	17744.6	17692.1	17890.8	17816.6
ETHYLTRIACETOXYSILANE	C8H14O6Si	17516.7	17201.2	17396.6	17350
ETHYLTRICHLOROSILANE	C2H5Cl3Si	16294.4	16171.2	16497.7	16379.4
ETHYL TRIMETHYL ACETATE	C7H14O2	16240	15965.1	16175.8	16119
ETHYL VINYL ETHER	C4H8O	16015.8	16132.5	15965.4	16020.6
2-ETHYL-m-XYLENE	C10H14	18372.5	17811.6	17919.7	17932.5
2-ETHYL-p-XYLENE	C10H14	17609.5	17376.9	17399.7	17413.9
3-ETHYL-o-XYLENE	C10H14	18241.4	18027.1	18210.8	18158.7
4-ETHYL-m-XYLENE	C10H14	17570.9	17522.5	17645.4	17601.1
4-ETHYL-o-XYLENE	C10H14	17591.8	17852.6	17793.4	17791
5-ETHYL-m-XYLENE	C10H14	17498.8	17737.4	17572	17614.3
ETHYNYLBENZENE	C8H6	19182.1	18900.8	19028.3	19005.4
EUGENOL	C10H12O2	20661.9	20978.1	20790.4	20833.9
FLUORANTHENE	C16H10	19802.3	22077.1	20789.8	21077.2
FLUORENE	C13H10	19988.2	19895.4	20100.2	20027.6
FLUORINE	F2	14282.2	14409.8	15287.1	14923.4
FLUOROBENZENE	C6H5F	18729.5	18602.3	18739.7	18697.4
FLUOSULFONIC ACID	FHO3S	26417.5	26226.3	26988.1	26702.5
FORMALDEHYDE	CH2O	21564.9	21292.8	21388.1	21377.2
FORMAMIDE	CH3NO	36561.8	38488.9	38281.8	38172
FORMANILIDE	C7H7NO	25154.8	26369.1	25566	25765.8
FORMIC ACID	CH2O2	25823.4	22632.8	21914.3	22520.8
4-FORMYLMORPHOLINE	C5H9NO2	25058.7	25139.2	25517.5	25358.1
FUMARIC ACID	C4H4O4	24830.2	24998	24776.7	24848.4
FUMARONITRILE	C4H2N2	23733.1	24601.7	24690.6	24568.2
FURAN	C4H4O	17845.4	17916.2	18366.9	18179.6
FURAN 2,5-DICARBOXYLIC ACID	C6H4O5	29415.4	28824.4	28847.4	28897.3
FURFURAL	C5H4O2	24332.3	23611.9	23710.5	23743.1
FURFURYL ALCOHOL	C5H6O2	24954.2	24972.3	25238.1	25130
GERMANIUM TETRACHLORIDE	Cl4Ge	16959.2	16942.9	16882.7	16908.4
L-GLUTAMIC ACID	C5H9NO4	22298	23071.6	22768.4	22812.3
GLUTARALDEHYDE	C5H8O2	22639.9	24068	23213.3	23412.4
GLUTARIC ACID	C5H8O4	28555.6	29045.8	29662.3	29366.7
GLUTARIC ANHYDRIDE	C5H6O3	27621.9	27316.4	27438.3	27420.1
GLUTARONITRILE	C5H6N2	26642.6	26294.1	26769.4	26614.1
GLYCEROL	C3H8O3	29553.1	31166.9	30915.6	30854.7
GLYCERYL TRIACETATE	C9H14O6	20421.1	20818.5	20909.9	20833.6
(3-GLYCIDOXYPROPYL)METHYLDIETHOXYSILANE	C11H24O4Si	17006.4	16997.8	16799.8	16879.9
GLYCINE	C2H5NO2	36678.6	39453.1	39522.2	39217.1
GLYCOL ALDEHYDE	C2H4O2	29811.3	36293.5	30382.4	32098.6
GLYCOLIC ACID	C2H4O3	27673.7	30752.5	28716.7	29223.1
GLYOXAL	C2H2O2	26644.1	24138.2	23487.5	23998.4
GUAIACOL	C7H8O2	22747.4	23766.6	23334.4	23405.4
HALOTHANE	C2HBrClF3	16030	15835.7	16115.7	16023.1
HELIUM-4	He	4751.34	6430.91	1531.86	3323.53
n-HENEICOSANE	C21H44	15931.1	15916.4	15737.6	15810.6
n-HEPTACOSANE	C27H56	15728.3	15655.4	15706.9	15693.6
n-HEPTADECANE	C17H36	16292.3	16194.1	16259	16242.9
n-HEPTADECANOIC ACID	C17H34O2	18639.8	19087.1	19125.4	19065.3
1-HEPTADECANOL	C17H36O	17870.6	18049.2	17918.8	17953.1
1-HEPTADECENE	C17H34	16351.1	16675.7	16422.1	16491.1
n-HEPTADECYLBENZENE	C23H40	16541	16287.1	16402.8	16381.9
1,1,1,2,3,3,3-HEPTAFLUOROPROPANE	C3HF7	12481.6	11749.3	11541.3	11697.7
HEPTAFLUOROPROPYL METHYL ETHER	C4H3F7O	13538	12983.5	13068	13089.7
HEPTANAL	C7H14O	19460.2	18730.4	18761.5	18822
n-HEPTANE	C7H16	14950.2	15014.3	14952.9	14971.1
n-HEPTANOIC ACID	C7H14O2	21616	22139.5	22043.1	22029.3
1-HEPTANOL	C7H16O	20554.4	20560.1	20395.4	20460.7
2-HEPTANOL	C7H16O	20212.8	19485.2	19854.1	19779.3
3-HEPTANOL	C7H16O	19784.1	19280.3	19796.3	19640.3
2-HEPTANONE	C7H14O	18127.6	18169.2	17947.7	18032.1
3-HEPTANONE	C7H14O	17904.7	17964.1	17803.2	17861.6
4-HEPTANONE	C7H14O	17844.5	17815.6	17655	17722.1
1-HEPTENE	C7H14	15184.5	15342.4	15452.7	15392.8
cis-2-HEPTENE	C7H14	15374.3	15527.2	15420.5	15447.9
cis-3-HEPTENE	C7H14	15345.8	15241.4	15317.9	15297.7
trans-2-HEPTENE	C7H14	15308.4	15342	15347.2	15341.8
trans-3-HEPTENE	C7H14	15074.4	15416.8	15678.3	15539.4
n-HEPTYL ACETATE	C9H18O2	16996.9	16985.8	16637.4	16777.9
n-HEPTYLBENZENE	C13H20	17648.1	17639.3	17619.5	17628.3
n-HEPTYL FORMATE	C8H16O2	17634.1	17555.8	17547.1	17558.4
n-HEPTYL MERCAPTAN	C7H16S	17487.1	17323.4	17268.6	17306.9
1-HEPTYNE	C7H12	16057.8	16130.4	16105.9	16108.4
HEXACHLOROBENZENE	C6Cl6	20238	19949.6	20285.6	20180
HEXACHLORO-1,3-BUTADIENE	C4Cl6	18746.4	18457.4	18210.5	18338.1
HEXACHLOROCYCLOPENTADIENE	C5Cl6	18977.4	18922.1	18995.9	18971.9
HEXACHLORODISILOXANE	Cl6OSi2	15131.5	15075.3	14963.7	15014
HEXACHLOROETHANE	C2Cl6	15077.2	15641.1	15807.1	15684.3
HEXACHLOROSILANE	Cl6Si2	16149.6	15660.8	15486.4	15605
n-HEXACOSANE	C26H54	15754.3	15538.2	15365.9	15456.5
1-HEXACOSENE	C26H52	15571.3	15284	15399.4	15382
HEXADECAMETHYLCYCLOOCTASILOXANE	C16H48O8Si8	14716.7	11941	13389.8	13087.9
HEXADECAMETHYLHEPTASILOXANE	C16H48O6Si7	11438.2	11112.1	11251.9	11228.6
n-HEXADECANE	C16H34	16157.1	15907.9	16048.1	16016.9
n-HEXADECANOIC ACID	C16H32O2	18656.6	18625.3	18714.8	18682.1
1-HEXADECANOL	C16H34O	18070.8	17853.9	17949.4	17932.9
1-HEXADECENE	C16H32	16377.4	16480	15804.2	16064.3
n-HEXADECYLBENZENE	C22H38	16493.3	16075.4	16432.5	16331.5
1,4-HEXADIENE	C6H10	15541.6	15406.4	15669.4	15577.7
1,5-HEXADIENE	C6H10	15078.9	15257.4	15217.1	15215.4
cis,trans-2,4-HEXADIENE	C6H10	16770.8	16375.8	16667	16590
trans,trans-2,4-HEXADIENE	C6H10	16694.5	16093.1	16408.6	16342.6
trans-1,3-HEXADIENE	C6H10	15949.3	15711	15831.5	15807.1
HEXAETHYLBENZENE	C18H30	15015.3	15909.1	15719.9	15706.2
HEXAFLUOROBENZENE	C6F6	15380.5	16346	15910	15987.8
HEXAFLUORO-1,3-BUTADIENE	C4F6	13841.9	13645.5	13443.6	13544
HEXAFLUOROETHANE	C2F6	12218.8	12608	12622.6	12577.8
1,1,1,2,3,3-HEXAFLUOROPROPANE	C3H2F6	14332.1	13056	13587.1	13502.3
1,1,1,3,3,3-HEXAFLUOROPROPANE	C3H2F6	14657.3	13080.2	13259.8	13345.7
HEXAFLUOROPROPYLENE	C3F6	11107.4	10994.2	10641.8	10794.1
HEXAMETHYLCYCLOTRISILOXANE	C6H18O3Si3	13359	12308.4	12557.7	12563.1
HEXAMETHYLDISILOXANE	C6H18OSi2	13257.7	12873.6	12932.9	12947.6
1,6-HEXAMETHYLENE DIISOCYANATE	C8H12N2O2	20005.2	21545.5	21266.6	21224.1
HEXAMETHYLENEIMINE	C6H13N	19197	18962.6	18971.2	18991.2
HEXAMETHYLENETETRAMINE	C6H12N4	20213	18957.9	18792.2	18984
HEXAMETHYL PHOSPHORAMIDE	C6H18N3OP	20873.6	18495.9	19028.4	19053.1
HEXANAL	C6H12O	19781.4	19304.6	19420.5	19421.8
HEXANAMIDE	C6H13NO	24489.7	24258.6	24178.1	24233.4
n-HEXANE	C6H14	14601	14667.5	14678.1	14667.2
1,6-HEXANEDIOL	C6H14O2	25625.5	26627.7	26426.4	26406.7
1,6-HEXANEDIOL DIACRYLATE	C12H18O4	16707.3	19841.8	17765	18282.2
HEXANENITRILE	C6H11N	19933.2	19447.9	19684.5	19638.4
n-HEXANOIC ACID	C6H12O2	21344.2	21932.5	21831.6	21813.1
1-HEXANOL	C6H14O	19945.4	19753.3	20381.7	20149.5
2-HEXANOL	C6H14O	20013.6	19761.3	20268.8	20091
3-HEXANOL	C6H14O	20358.2	20178.4	19983.1	20079.2
2-HEXANONE	C6H12O	18821.9	18117	18664.6	18516
3-HEXANONE	C6H12O	18529.2	18200.3	18253.6	18265.2
n-HEXATRIACONTANE	C36H74	15375.2	15483	15275.1	15347.5
1-HEXATRIACONTENE	C36H72	15192	14969.1	15020.4	15022.2
1-HEXENE	C6H12	15057.7	14988.5	14965.9	14981.9
cis-2-HEXENE	C6H12	15297.4	15003	15291.2	15205.4
cis-3-HEXENE	C6H12	15177.7	15075.4	15285.8	15211.9
trans-2-HEXENE	C6H12	15199.7	15181.5	15285.8	15245.9
trans-3-HEXENE	C6H12	15192.5	15249.8	15287.2	15266.5
5-HEXEN-2-ONE	C6H10O	19972.5	19159.5	19645.8	19532.6
2-HEXOXYETHANOL	C8H18O2	18987.6	19066.3	18667.3	18819.1
2-(2-HEXOXYETHOXY)ETHANOL	C10H22O3	19237	19091.7	19216.4	19181
n-HEXYL ACETATE	C8H16O2	16868.8	17264.6	16985.7	17057.7
n-HEXYLBENZENE	C12H18	17452.3	17653.6	17566.8	17581.4
trans-2,n-HEXYL-DECAHYDRONAPHTHALENE	C16H30	17475.7	17071.9	17393.3	17305.1
HEXYLENE GLYCOL	C6H14O2	21808.1	21827.9	21548.6	21658.3
n-HEXYL FORMATE	C7H14O2	17819.6	17700.2	17686.2	17703.8
n-HEXYL IODIDE	C6H13I	17763.5	17821.9	17780.9	17791.4
n-HEXYL MERCAPTAN	C6H14S	18048.2	18486.3	18368.7	18372
1-n-HEXYLNAPHTHALENE	C16H20	18833.2	18835.9	18844.9	18841
1-n-HEXYL-1,2,3,4-TETRAHYDRONAPHTHALENE	C16H24	17782	18169.3	18151	18119.6
1-HEXYNE	C6H10	15862.1	16045.3	15794.3	15876.4
2-HEXYNE	C6H10	16585.2	16748.7	16805.8	16766.6
3-HEXYNE	C6H10	15888.7	16395.3	16113.8	16175.7
HMX	C4H8N8O8	25750.1	23612.3	27164.7	25957.6
HYDRACRYLONITRILE	C3H5NO	29119.2	29729.2	30070.7	29873.1
HYDRAZINE	H4N2	33173.9	36340.1	36054.5	35852.1
HYDRAZOBENZENE	C12H12N2	22520.2	23325.5	23369.2	23271.2
HYDROGEN	H2	6067.35	6483.9	5089.37	5605.53
HYDROGEN BROMIDE	BrH	15159.9	14641.5	14989.3	14902
HYDROGEN CHLORIDE	ClH	14664.3	23759	17818.4	19285.2
HYDROGEN CYANIDE	CHN	25331.6	25051	24695.7	24865.9
HYDROGEN FLUORIDE	FH	21923	16051.7	16224	16742.2
HYDROGEN IODIDE	HI	16921.7	17050.7	17237.8	17150.1
HYDROGEN (para)	H2	5913.64	6483.9	5089.37	5590.16
HYDROGEN PEROXIDE	H2O2	34454.7	38188.6	35764.1	36360.5
HYDROGEN SULFIDE	H2S	16547.1	16227.2	16375.3	16348.1
p-HYDROQUINONE	C6H6O2	28535.5	27147.6	27403.8	27440.1
HYDROXYACETONITRILE	C2H3NO	28720.2	32816.3	32702.2	32338.2
2-HYDROXYACETOPHENONE	C8H8O2	20934.2	20396.1	20500.4	20512.5
p-HYDROXYBENZALDEHYDE	C7H6O2	29340.7	25715.9	26069.2	26290.4
4-HYDROXYBUTYRALDEHYDE	C4H8O2	25684.6	26072.5	25760	25846.2
3-HYDROXYBUTYROLACTONE	C4H6O3	28119.9	29804	28521.5	28866.1
HYDROXYCAPROIC ACID	C6H12O3	24436.5	25289.1	25289	25203.8
4-((2-HYDROXYETHOXY)CARBONYL) BENZOIC ACID	C10H10O5	21300	21529.4	21449.5	21458.5
2-HYDROXYETHYL ACRYLATE	C5H8O3	23254.5	23280.9	23184.6	23220.5
2-HYDROXYETHYL METHACRYLATE	C6H10O3	23083.4	24476.8	24321.2	24244.1
4-(2-HYDROXYETHYL)MORPHOLINE	C6H13NO2	22891.4	22892.7	23183.2	23066.9
N-(2-HYDROXYETHYL)PIPERAZINE	C6H14N2O	22050.3	23049.8	23011.8	22927
6-HYDROXYHEXANOIC ACID	C6H12O3	23325	26318.8	25722.9	25661.9
alpha-HYDROXYISOBUTYRAMIDE	C4H9NO2	26007.1	25693.4	26113.8	25977
alpha-HYDROXYISOBUTYRIC ACID	C4H8O3	25367.7	25765.7	25829.7	25764.3
4-HYDROXYMETHYL BENZOIC ACID	C8H8O3	29301.6	25735.1	25764.1	26109.2
5-(HYDROXYMETHYL) FURFURAL	C6H6O3	27558	28100.2	27603.9	27748.2
3-HYDROXY-2-METHYL PROPIONALDEHYDE	C4H8O2	25377.9	25995.7	25703.9	25758.8
HYDROXYPIVALYL HYDROXYPIVALATE	C10H20O4	18970.9	18986.2	18901.4	18933.8
2-HYDROXYPROPYL ACRYLATE	C6H10O3	22072.4	21107.7	21633.9	21519.9
4-HYDROXYSTYRENE	C8H8O	21856.2	21028	21574.5	21438.7
IBUPROFEN	C13H18O2	18676.3	18680.4	18860.7	18788.2
IMIDAZOLE	C3H4N2	29919.8	30865.3	30662	30648.7
2,2'-IMINOBIS-ACETONITRILE	C4H5N3	27085.6	27336	27796.3	27587.1
INDANE	C9H10	19339.3	19409.4	19657.7	19551.4
INDENE	C9H8	20480.7	19924.6	19344.1	19631.9
INDOLE	C8H7N	23520.2	23682.1	23924.1	23811.1
IODOBENZENE	C6H5I	21251.5	21496.1	21122.7	21247.6
ISOAGATHOLAL	C20H32O2	19918.9	18049.2	17713.5	18034.7
ISOBUTANE	C4H10	12633.1	13163.8	12625.5	12787.8
ISOBUTENE	C4H8	14188.5	13693.9	13783.8	13797.3
ISOBUTYL ACETATE	C6H12O2	16931.5	16613.3	16631.4	16656
ISOBUTYL ACRYLATE	C7H12O2	18247.8	17604.4	17542.9	17631.8
ISOBUTYLAMINE	C4H11N	17289.3	17689.6	17384.3	17466.4
ISOBUTYLBENZENE	C10H14	17206.4	17194.6	16958.3	17054
ISOBUTYL CHLORIDE	C4H9Cl	16759.6	17186.5	16805.5	16915.2
iso-BUTYLCYCLOHEXANE	C10H20	16078.1	16034.7	15747.9	15866.9
ISOBUTYLENE GLYCOL	C4H10O2	25629	26234.9	25441.1	25698
ISOBUTYL FORMATE	C5H10O2	17666.2	17890.2	17807.9	17818.4
ISOBUTYL ISOBUTYRATE	C8H16O2	16782.4	15985	16105.5	16137.1
ISOBUTYL MERCAPTAN	C4H10S	17227.8	17569.1	17328.8	17390.8
ISOBUTYL METHACRYLATE	C8H14O2	16809.2	16914.7	17042.1	16980.6
ISOBUTYL-tert-BUTYL ETHER	C8H18O	14661.6	14499.7	14610.2	14582.2
ISOBUTYRIC ACID	C4H8O2	18350.3	20013.9	19788.7	19712.4
ISOBUTYRIC ANHYDRIDE	C8H14O3	17833.2	17108.5	17212.2	17243.2
ISOPENTANE	C5H12	13708.6	13851.7	13839.6	13830.1
ISOPENTYL ACETATE	C7H14O2	16982.2	16355	16461.9	16481.9
ISOPENTYL BUTYRATE	C9H18O2	16754.3	16294.6	16576.5	16509.7
ISOPENTYL ISOVALERATE	C10H20O2	16976.5	16579.9	16526.8	16587.7
ISOPHORONE	C9H14O	19140.9	18333.1	18378.2	18440.9
ISOPHORONE DIISOCYANATE	C12H18N2O2	17826.1	19132.4	18300.3	18502.5
ISOPHTHALIC ACID	C8H6O4	25854.7	27941.6	26788.5	27041
ISOPHTHALOYL CHLORIDE	C8H4Cl2O2	22487.1	21904.6	22168.5	22121.2
ISOPIMARIC ACID	C20H30O2	19700.6	17803.2	17742.2	17956.3
ISOPRENE	C5H8	15705.7	15086.9	15164.4	15195.3
ISOPROPANOL	C3H8O	23166.7	23498.9	22994.6	23163.1
p-ISOPROPENYL PHENOL	C9H10O	23403.9	23496	23444.9	23456.2
p-ISOPROPENYLSTYRENE	C11H12	19323	19667.9	19525.8	19548.2
1-ISOPROPOXY-2-PROPANOL	C6H14O2	18719.5	18397.1	18387.3	18423.4
ISOPROPYL ACETATE	C5H10O2	17008.5	17004.7	17016.6	17012.2
ISOPROPYL ACRYLATE	C6H10O2	16693.6	16882.1	16872	16857.2
ISOPROPYLAMINE	C3H9N	17156.8	16578.4	17122.4	16962.7
ISOPROPYL BUTYL ETHER	C7H16O	15210.9	15344.5	15157.8	15219.1
ISOPROPYL CHLORIDE	C3H7Cl	16564.3	17002.8	16691.6	16772.2
ISOPROPYLCYCLOHEXANE	C9H18	16287.7	16408.7	15917.5	16101.9
ISOPROPYLCYCLOPENTANE	C8H16	15873.5	16077.6	16045.5	16037.9
ISOPROPYL IODIDE	C3H7I	18899.9	17755.3	18743.5	18462.7
ISOPROPYL ISOBUTYL ETHER	C7H16O	14868.3	14977.2	14872.9	14903.7
ISOPROPYL MERCAPTAN	C3H8S	17098.3	16986.6	16795.7	16883.3
ISOPROPYL MYRISTATE	C17H34O2	17200.7	17092.5	17015.2	17056.9
ISOPROPYL PALMITATE	C19H38O2	16453.2	16326.4	16277.2	16309.5
ISOQUINOLINE	C9H7N	22990.9	23427.9	22654.4	22920.1
ISOSORBIDE	C6H10O4	27277.1	27698.2	27840.3	27741.4
ISOVALERIC ACID	C5H10O2	20117.4	21064.1	21013.8	20939.3
ISOXAZOLE	C3H3NO	23726.9	23283.2	23595.4	23514.9
ITACONIC ACID	C5H6O4	28553.2	28889.5	29007.5	28926.7
KRYPTON	Kr	14768.2	14687.1	15209.9	15008.9
LACTONITRILE	C3H5NO	28111.3	29138.7	28839.1	28856.2
LEVOGLUCOSAN	C6H10O5	24129.8	25446.9	24801.6	24928
LEVULINIC ACID	C5H8O3	26585.2	27631.8	27498.5	27447.1
d-LIMONENE	C10H16	17023.6	17268.9	16807.8	16967.7
LINOLEIC ACID	C18H32O2	18501.3	18557	18267.7	18377.8
LINOLENIC ACID	C18H30O2	18657.8	18729.4	18875.3	18809.8
LYSINE	C6H14N2O2	21322.4	21746.9	21684.1	21666.7
MALEIC ACID	C4H4O4	30128.4	30230.7	30379.6	30309.8
MALEIC ANHYDRIDE	C4H2O3	26757.2	25904	26169.3	26148.5
MALEONITRILE	C4H2N2	30138.4	30278.1	30264.4	30255.9
MALIC ACID	C4H6O5	30321	32077	31851.5	31766.1
MALONIC ACID	C3H4O4	30548.5	30623.7	30525.9	30557.5
MALONONITRILE	C3H2N2	30483.7	30742.4	30751.2	30721.8
MALTOL	C6H6O3	24076.4	23403.1	23216.3	23358.3
MELAMINE	C3H6N6	28943.2	29629.4	29342.3	29388.5
p-MENTHANE HYDROPEROXIDE	C10H20O2	20427.8	20593.3	21001.4	20821.6
L-MENTHOL	C10H20O	18200.6	18181.6	18270.6	18236.9
2-MERCAPTOBENZOTHIAZOLE	C7H5NS2	19175.4	17620.3	17502.1	17704.9
2-MERCAPTOETHANOL	C2H6OS	25262.6	26300.3	25878.8	25943.6
3-MERCAPTOPROPIONIC ACID	C3H6O2S	25874.7	26635.5	26629.5	26555.8
[3-(MERCAPTO)PROPYL]TRIETHOXYSILANE	C9H22O3SSi	16496	16343.3	16352.3	16364
MERCURY DICHLORIDE	Cl2Hg	26915.8	33423.5	28091.5	29573.5
MESITYLENE	C9H12	17951.2	17895.8	17861.4	17880.7
MESITYL OXIDE	C6H10O	19290.4	19293.6	19264.9	19276
METHACROLEIN	C4H6O	19413.8	19246.5	19043.9	19141.7
METHACRYLONITRILE	C4H5N	21940.1	21162.8	21825.7	21638.3
METHANE	CH4	13883	12876.6	13863.2	13569.2
METHANESULFONYL CHLORIDE	CH3ClO2S	24734.1	24393.8	24580.2	24539.7
METHANOL	CH4O	26606.4	29373.8	29265.4	29032
METHOXYACETIC ACID	C3H6O3	27444.3	28508.7	28780.6	28565.4
METHOXYACETONE	C4H8O2	20507.2	20164.2	20573.9	20444.3
METHOXYDIHYDROPYRAN	C6H10O2	19073.2	18899.5	18933.9	18937.5
2-METHOXYETHANOL	C3H8O2	23101.1	23103.9	22847.4	22949.7
2-(2-METHOXYETHOXY)ETHANOL	C5H12O3	21879.4	22430.7	22419.6	22368.9
TRIS(2-METHOXYETHOXY)VINYLSILANE	C11H24O6Si	17040	16284	16313.5	16377.3
4-(2-METHOXYETHYL)MORPHOLINE	C7H15NO2	20276.7	20538.7	20185.3	20300.5
3-METHOXYISOPROPYLAMINE	C4H11NO	20016.7	18443.2	18152.3	18426
4-METHOXYPHENYLACETIC ACID	C9H10O3	21178	21610.7	21386.3	21432.8
2-METHOXY PROPANOL-1	C4H10O2	20778.3	21069.5	20833.8	20898.9
1-METHOXY-2-PROPANOL PROPANOATE	C7H14O3	18074	17811.4	17716.3	17780.6
3-METHOXYPROPIONITRILE	C4H7NO	24924.1	24853	24747	24796.5
METHYL ACETATE	C3H6O2	18074.1	17929.2	18579.6	18333.9
METHYL ACETOACETATE	C5H8O3	21394.5	21976.8	21695.9	21750
METHYLACETYLENE	C3H4	15686.8	16061.7	15770.2	15849.3
METHYL ACRYLATE	C4H6O2	18934.3	19401.6	19219.7	19245.7
(3-METHYLACRYLOXYPROPYL)TRICHLOROSILANE	C7H11Cl3O2Si	17219.5	18003.4	17928.7	17880.2
METHYLAL	C3H8O2	15463.3	16255.4	16260.5	16179.3
METHYLAMINE	CH5N	19773.5	21401.5	20821.1	20890.4
2-METHYL-2-AMINOBUTANE	C5H13N	16298.9	16224.8	15843.7	16003.5
N-METHYLANILINE	C7H9N	21730	21582	21684.4	21658.3
METHYL BENZOATE	C8H8O2	20935.5	20897.3	20654.5	20755.5
2-METHYLBENZOFURAN	C9H8O	20569.9	20782.5	20674.6	20696.5
2-METHYL BENZOTHIOPHENE	C9H8S	20607.5	19971.9	20182.6	20161.9
alpha-METHYLBENZYL ALCOHOL	C8H10O	22126.9	21854	21381.3	21597.7
alpha-METHYLBENZYL ALCOHOL FORMATE	C9H10O2	19927.3	19026.6	19700.8	19521.2
2-(alpha-METHYLBENZYLOXY)-1-PROPANOL	C11H16O2	20341.2	20486.7	20544.1	20506.6
3-METHYL-1,2-BUTADIENE	C5H8	16024	16134	15946.9	16010.8
2-METHYL-1-BUTANOL	C5H12O	20948	21290.6	21620.3	21454.2
2-METHYL-2-BUTANOL	C5H12O	20303.9	20283.8	20236	20257.2
3-METHYL-1-BUTANOL	C5H12O	20417.2	20488.9	21522.8	21102.1
2-METHYL-1-BUTENE	C5H10	14716.8	14739.5	14773.2	14757.5
2-METHYL-2-BUTENE	C5H10	15041	15047.7	15099.3	15078
3-METHYL-1-BUTENE	C5H10	14012.3	13750.8	13941.5	13891.4
2-METHYL-1-BUTENE-3-YNE	C5H6	15811.8	15579.8	15641.5	15640
3-METHYL-1-BUTYNE	C5H8	14890.8	14841	14865	14860.4
2-METHYLBUTYRALDEHYDE	C5H10O	18037.4	18247.7	17988	18070.8
3-METHYLBUTYRALDEHYDE	C5H10O	18179.7	18587.4	18433.1	18454.1
2-METHYLBUTYRIC ACID	C5H10O2	18926.3	21492.7	20706.9	20764.6
METHYL CAPRYLATE	C9H18O2	17164.8	17095.8	16865.5	16964.5
METHYL CHLORIDE	CH3Cl	17154.2	17578.6	17622.4	17562.4
METHYL CHLOROACETATE	C3H5ClO2	21857.4	22563.9	22036.9	22177.1
METHYL CHLOROSILANE	CH5ClSi	14921.8	14505	14565.6	14583
METHYL CYANOACETATE	C4H5NO2	26722	26163.3	27250.1	26871.2
METHYLCYCLOHEXANE	C7H14	15961.8	15978.9	15943.7	15956.1
4-METHYL-CYCLOHEXANE-METHANOL	C8H16O	20463.5	20407.7	20476	20454.3
1-METHYLCYCLOHEXANOL	C7H14O	20419.3	20351	20664.3	20545.8
cis-2-METHYLCYCLOHEXANOL	C7H14O	21170.2	21233.4	21388.2	21319.9
cis-3-METHYLCYCLOHEXANOL	C7H14O	21477.5	21756.2	21419.3	21526.2
cis-4-METHYLCYCLOHEXANOL	C7H14O	21433.2	21391.1	21162	21257.9
trans-2-METHYLCYCLOHEXANOL	C7H14O	21332.9	21609.6	21401.9	21457.3
trans-3-METHYLCYCLOHEXANOL	C7H14O	21194.5	21393.5	21196	21255.1
trans-4-METHYLCYCLOHEXANOL	C7H14O	21376.1	21608.7	21259	21375.6
N-METHYLCYCLOHEXYLAMINE	C7H15N	18460.1	18281	18271.7	18293.4
METHYLCYCLOPENTADIENE	C6H8	17584.1	17281.5	17525.4	17458.1
METHYLCYCLOPENTADIENE DIMER	C12H16	17434.7	17230.9	17564.2	17451.3
METHYLCYCLOPENTANE	C6H12	15899.3	15807.7	15966.8	15912.3
3-METHYLCYCLOPENTANONE	C6H10O	20015.4	20106.7	19774.8	19898.4
1-METHYLCYCLOPENTENE	C6H10	16371	16776	16570.4	16612.2
3-METHYLCYCLOPENTENE	C6H10	16144.7	16226.3	16284.7	16253.2
4-METHYLCYCLOPENTENE	C6H10	16276.1	16321.9	16383.8	16354.5
METHYLCYCLOPROPANE	C4H8	14626.3	14446.9	14583.6	14546.9
1-METHYL-DECALIN	C11H20	17495.3	17245.7	17339.1	17326.7
2-METHYLDECANE	C11H24	15347.9	15208.7	15307.1	15281.6
3-METHYLDECANE	C11H24	15398.2	15617.1	15535.5	15546.2
METHYL DECANOATE	C11H22O2	17199.8	16944.8	17226.4	17139.3
4-METHYL DIBENZOTHIOPHENE	C13H10S	20278.8	20322.8	20426	20380.3
METHYL DICHLOROSILANE	CH4Cl2Si	15892.2	15399.7	15418.9	15460.5
METHYL DIETHANOLAMINE	C5H13NO2	24439.9	24909.6	25007.4	24921.3
2-METHYL-1,3-DIOXOLANE	C4H8O2	19006	19672.7	19420.6	19454.8
2-METHYLDODECANE	C13H28	15749.1	15504.6	15546.9	15554.5
3-METHYLDODECANE	C13H28	15493.6	15699.5	15546.3	15587
METHYL DODECANOATE	C13H26O2	17349.9	17084.4	16911.7	17007.3
2-METHYL-DODECAN-1-OL	C13H28O	18511.6	18042.2	18206.9	18187.9
METHYL EICOSANOATE	C21H42O2	16548	16496.8	16691.6	16618.8
METHYL ERUCATE	C23H44O2	16699.6	17126.2	16847.4	16916.3
METHYLETHANOLAMINE	C3H9NO	25687	25940.6	25729.6	25788.6
1-METHYL-1-ETHYLCYCLOPENTANE	C8H16	15840.4	15798.4	15799.8	15803.4
METHYL ETHYL ETHER	C3H8O	15630.6	15623.1	15870.5	15772.3
METHYL ETHYL KETONE	C4H8O	21364.5	21276.5	20937.2	21081.8
2-METHYL-3-ETHYLPENTANE	C8H18	14832.6	15188.2	15168.5	15140.8
3-METHYL-3-ETHYLPENTANE	C8H18	15097.4	15250.8	15074.2	15129.5
METHYL ETHYL SULFIDE	C3H8S	17784.6	17852.8	17672.5	17737.8
METHYL FLUORIDE	CH3F	12276.5	10800	11498.4	11366.7
METHYL FORMATE	C2H4O2	17671.5	19287.1	18244.2	18499.8
METHYL-4-FORMYLBENZOATE	C9H8O3	22406.5	26791.3	24949.4	25247.7
5-METHYL FURFURAL	C6H6O2	22570.8	22657.9	22353.4	22466.5
METHYLGERMANIUM TRICHLORIDE	CH3Cl3Ge	19342.8	18234.8	18682.6	18614.3
METHYLGLUTARONITRILE	C6H8N2	23897.9	23781.3	24330.5	24122.5
METHYL GLYCOLATE	C3H6O3	25433.9	25136.9	24939.3	25048
METHYL GLYOXAL	C3H4O2	22240.8	21748.5	22093.9	22005
4-METHYLGUAIACOL	C8H10O2	21957.2	22223.5	21929.7	22020.6
2-METHYLHEPTANAL	C8H16O	17566	17522	17524.7	17528
2-METHYLHEPTANE	C8H18	14965	14932.8	14768.5	14837.4
3-METHYLHEPTANE	C8H18	15125.9	15259.1	15143	15176.1
4-METHYLHEPTANE	C8H18	15116	15049	14993.8	15022.6
2-METHYL-1-HEPTANOL	C8H18O	17351	17816	18074.6	17924.7
2-METHYL-1-HEPTENE	C8H16	15217.9	15448.3	15286.9	15328.4
4-METHYL-1-HEPTENE	C8H16	15193.8	15040.1	15004.1	15033.9
6-METHYL-1-HEPTENE	C8H16	15077.5	15087.2	15065.7	15073.3
2-METHYLHEXANAL	C7H14O	17983.7	17432.4	17673.6	17632.2
3-METHYLHEXANAL	C7H14O	17865	17140.7	17513.4	17436.7
2-METHYLHEXANE	C7H16	14732.5	14814.1	14839.5	14821.2
3-METHYLHEXANE	C7H16	14867.4	14905	14892.2	14893.6
2-METHYLHEXANOIC ACID	C7H14O2	20561.6	21029.9	20898.6	20904.3
2-METHYL-1-HEXANOL	C7H16O	20145.6	20057	20199.2	20151.2
5-METHYL-1-HEXANOL	C7H16O	20283.2	20176.9	20190.1	20195.5
5-METHYL-2-HEXANONE	C7H14O	17847.5	17304.3	17874.5	17700.7
2-METHYL-1-HEXENE	C7H14	15225.3	15234.1	15136.8	15174.8
3-METHYL-1-HEXENE	C7H14	14953.9	14977.4	14922.5	14942.1
4-METHYL-1-HEXENE	C7H14	15051.2	15094.4	15294.9	15210.4
5-METHYL-1-HEXENE	C7H14	14925	14988.9	14969.3	14970.8
METHYL HYDROPEROXIDE	CH4O2	27559	28915.8	28946.9	28798.7
METHYL alpha-HYDROXYISOBUTYRATE	C5H10O3	19759.9	19915.4	19914.5	19899.3
1-METHYL-3-HYDROXY-5-ISOPROPYL BENZENE	C10H14O	19650.9	18979.4	19828.9	19556.3
1-METHYL-3-HYDROXY-6-ISOPROPYL BENZENE	C10H14O	18382.3	18103.7	17705.7	17892.8
2-METHYL-, 3-HYDROXY-2,2,4-TRIMETHYLPENTYL PROPANOATE	C12H24O3	17563.2	17362.6	17317.1	17355.3
1-METHYLINDAN	C10H12	18555.3	19045.5	18747.1	18817.4
5-METHYLINDAN	C10H12	18420.4	19068.3	18909.7	18908.3
1-METHYLINDENE	C10H10	19028.9	19164.4	19022.3	19065.6
2-METHYLINDENE	C10H10	19430.5	19780.7	19637.5	19659.8
METHYL IODIDE	CH3I	20409	20454	20225	20312.1
METHYL ISOBUTYL ETHER	C5H12O	15298.9	15482.1	15226.4	15310.4
METHYL ISOBUTYL KETONE	C6H12O	17688.9	17868.9	18051.1	17960.2
METHYL ISOBUTYRATE	C5H10O2	17526.1	17326	17312.9	17338.2
METHYL ISOCYANATE	C2H3NO	22036.2	21202.8	21266.3	21324.3
METHYL ISOPROPENYL KETONE	C5H8O	19057.2	18765.3	18568.6	18676.5
METHYL ISOPROPYL ETHER	C4H10O	15367.2	15448.2	15209.1	15296.6
METHYL ISOPROPYL KETONE	C5H10O	18102.7	17696.4	18090.6	17973.6
METHYL ISOPROPYL SULFIDE	C4H10S	17186.9	17321.4	17318.6	17306.3
METHYL LACTATE	C4H8O3	22211.5	22621.6	22030.7	22226
METHYL LINOLEATE	C19H34O2	16786.6	16626.9	17050.4	16897
METHYL LINOLENATE	C19H32O2	16794.7	16689.2	16921.6	16839.2
METHYL MALEIC ANHYDRIDE	C5H4O3	25878.3	24975.4	25054.7	25113.3
METHYL MERCAPTAN	CH4S	19371.4	19206.4	19514.2	19407.6
3-(METHYLMERCAPTO)PROPANAL	C4H8OS	22056.8	21171.5	21621.8	21530.2
METHYL-3-MERCAPTOPROPIONATE	C4H8O2S	19965.6	20727.4	20467.6	20495.3
METHYL METHACRYLATE	C5H8O2	18868.8	18640.6	18499	18578.5
METHYL alpha-METHOXYISOBUTYRATE	C6H12O3	18584.7	18187.5	18593.7	18470.9
1-METHYL-3-(METHYLETHOXY)BENZENE	C10H14O	18363.4	17998.5	17889.5	17969.6
METHYL MYRISTATE	C15H30O2	17166	17275.5	17408.6	17344.4
1-METHYLNAPHTHALENE	C11H10	20000.4	20167.8	20118.8	20121.7
2-METHYLNAPHTHALENE	C11H10	20214.7	20446.3	20367	20375.6
METHYL n-BUTYL ETHER	C5H12O	15816.6	16060.7	15790.3	15874
METHYL n-BUTYL SULFIDE	C5H12S	17639.3	17692.1	17865.8	17791
METHYL n-BUTYRATE	C5H10O2	17890.6	17905.4	17449.4	17630.3
METHYL NONAFLUORO-N-BUTYL ETHER	C5H3F9O	13243.7	12760.9	12917.7	12903.3
2-METHYLNONANE	C10H22	15385	15226	15213.3	15234.3
3-METHYLNONANE	C10H22	15454.8	15482.6	15023.4	15204.3
4-METHYLNONANE	C10H22	15464.4	15341.9	15351.8	15360.1
5-METHYLNONANE	C10H22	15464	15460.6	15348.2	15393.5
8-METHYL-1-NONANOL	C10H22O	19230.2	18989.5	18835.9	18921.4
2-METHYL-1-NONENE	C10H20	15676.2	15898.1	15806.4	15820.9
8-METHYL-1-NONENE	C10H20	15869.9	16658.6	16259	16340
METHYLNORBORNENE	C8H12	16856.1	16860.2	16830.8	16842.2
METHYL n-PENTYL ETHER	C6H14O	15717	15888.5	15525.3	15653.4
METHYL n-PROPYL ETHER	C4H10O	15625	15418.8	15796.4	15666
METHYL n-PROPYL SULFIDE	C4H10S	17690.3	17609.7	17727.5	17688.5
2-METHYL OCTANAL	C9H18O	18042.7	17740.6	17790.3	17800.6
2-METHYLOCTANE	C9H20	15242.4	14946.6	15054.6	15041
3-METHYLOCTANE	C9H20	15291.8	15343.3	15251.8	15283.2
4-METHYLOCTANE	C9H20	15202.4	15204.8	15041.6	15106.6
2-METHYLOCTANOIC ACID	C9H18O2	19274.1	20272.2	19835.4	19910.3
4-METHYL-1-OCTANOL	C9H20O	19117.6	18863.3	18784.3	18841.3
6-METHYL-1-OCTANOL	C9H20O	19259.9	19091.3	19227.2	19189.7
2-METHYL-1-OCTENE	C9H18	15370.4	15209.9	15396.3	15337.8
7-METHYL-1-OCTENE	C9H18	15580.4	15733.8	15661.7	15675.2
METHYL OLEATE	C19H36O2	17040.1	17044.5	16808.6	16902.5
METHYL PALMITATE	C17H34O2	17069.7	17131.3	17284.5	17217
METHYL PALMITOLEATE	C17H32O2	17441.1	17353.4	17515.8	17459.6
METHYL para-TOLUATE	C9H10O2	19265.2	20337.2	19975.6	20013
3-METHYL-1,4-PENTADIENE	C6H10	15071.5	14967.2	15012.7	15004.9
trans-2-METHYL-1,3-PENTADIENE	C6H10	16574.9	16557.9	16548.8	16554.2
2-METHYLPENTANE	C6H14	14355	14145.1	14307.3	14263.4
3-METHYLPENTANE	C6H14	14439.9	15042.3	14411.5	14603.5
2-METHYL-1,3-PENTANEDIOL	C6H14O2	24794.4	26256.7	26409	26201.9
2-METHYL-1-PENTANOL	C6H14O	20851.9	20815.3	20611.1	20696.5
3-METHYL-1-PENTANOL	C6H14O	21085.9	21570	21550.1	21509.6
3-METHYL-3-PENTANOL	C6H14O	18925.8	18257.4	18394.4	18406.4
3-METHYL-2-PENTANONE	C6H12O	18401.1	18017.4	18118.6	18116.5
2-METHYL-2-PENTENAL	C6H10O	19679.6	19421	18731	19032.8
2-METHYL-1-PENTENE	C6H12	15018.5	14720.7	14848.2	14826.9
2-METHYL-2-PENTENE	C6H12	15324	15136.7	15331.4	15272.3
3-METHYL-1-PENTENE	C6H12	14454.6	14344	14442.8	14414.3
3-METHYL-cis-2-PENTENE	C6H12	15510.3	15464.1	15518.3	15501.3
3-METHYL-trans-2-PENTENE	C6H12	15284.1	15563.1	15850.6	15707.7
4-METHYL-1-PENTENE	C6H12	14429.6	14376.8	14308.2	14340.9
4-METHYL-cis-2-PENTENE	C6H12	14650	14600	14590.6	14599.4
4-METHYL-trans-2-PENTENE	C6H12	14702.5	14459.3	14590.6	14562.4
METHYL PENTYL SULFIDE	C6H14S	17580.7	17269	17381.8	17367.8
4-METHYLPHENANTHRENE	C15H12	20489.9	20497.5	20173.3	20302.3
METHYL PHENYL SULFIDE	C7H8S	21070	20720	20626.1	20698.7
N-METHYLPIPERIDINE	C6H13N	17701.5	17290.1	17060	17193.2
2-METHYLPROPANAL	C4H8O	18847	19004.5	18727.5	18822.5
2-METHYL-1,3-PROPANEDIOL	C4H10O2	27594.6	28043.4	28275.2	28137.6
2-METHYL-1-PROPANOL	C4H10O	22425	22537.1	22310.2	22389.7
2-METHYL-2-PROPANOL	C4H10O	21383.9	21163.6	21688.8	21500.7
METHYL PROPIONATE	C4H8O2	18366.6	18500.7	18592.7	18542.5
1-METHYL-2-n-PROPYLBENZENE	C10H14	17612.9	18106.7	17584.7	17744.1
1-METHYL-3-n-PROPYLBENZENE	C10H14	17347.3	16896.8	16949.1	16973.3
1-METHYL-4-n-PROPYLBENZENE	C10H14	17113.4	16864.7	16673.9	16775.1
2-METHYLPYRIDINE	C6H7N	20172.8	20212.6	19924.5	20035.8
3-METHYLPYRIDINE	C6H7N	20832.9	20465.7	20831.3	20721.8
4-METHYLPYRIDINE	C6H7N	21368.7	21135.3	21848.9	21586.8
N-METHYLPYRROLE	C5H7N	20434.5	21033.8	20369.2	20575.1
N-METHYLPYRROLIDINE	C5H11N	17796.2	16572.5	16746.2	16799.1
N-METHYL-2-PYRROLIDONE	C5H9NO	24240	23788.4	23342.8	23566.2
8-METHYLQUINOLINE	C10H9N	20100.9	20827.9	20603.3	20620.5
METHYL SALICYLATE	C8H8O3	21029.1	21173.9	21157.6	21149.6
METHYL sec-BUTYL ETHER	C5H12O	15322.2	15244.3	15173.3	15209.5
METHYL SILICATE	C4H12O4Si	18304.4	16393.5	16995.4	16945.7
METHYL STEARATE	C19H38O2	16422.6	16128.4	16245.7	16228.2
alpha-METHYLSTYRENE	C9H10	18305.4	18035.1	18278.4	18208.1
m-METHYLSTYRENE	C9H10	18925.3	18907.9	18635.7	18746.3
o-METHYLSTYRENE	C9H10	18948.7	18489.1	18481	18530.2
p-METHYLSTYRENE	C9H10	18899.8	18986.6	19017	18996.2
3-METHYL SULFOLANE	C5H10O2S	24896.5	24799.4	24619	24700.9
METHYL t-BUTYL SULFIDE	C5H12S	16470.6	16407.5	16500	16469.3
METHYL tert-BUTYL ETHER	C5H12O	15306.8	15034.9	15119	15112.6
METHYL tert-PENTYL ETHER	C6H14O	15515	15708.3	15438	15526.8
2-METHYLTETRAHYDROFURAN	C5H10O	17350.7	17489.5	17538.8	17505.2
1-METHYLTETRALIN	C11H14	18740.7	19619.7	18880.2	19088.1
2-METHYLTHIACYCLOPENTANE	C5H10S	19049.9	18865	18945.9	18932
2-METHYL THIAINDAN	C9H10S	20439.5	20517.2	20399.4	20438.8
2-METHYLTHIOPHENE	C5H6S	19300.3	19071	19362.3	19268.7
3-METHYLTHIOPHENE	C5H6S	19320.1	19258.1	19171.5	19212.4
N-METHYLTHIOPYRROLIDONE	C5H9NS	27771	26092.3	26536.5	26526.7
METHYL t-PENTYL SULFIDE	C6H14S	17684.8	17822.3	18055.8	17948.7
METHYLTRIACETOXYSILANE	C7H12O6Si	17232.6	17077.5	17167.9	17147.2
METHYL TRICHLOROSILANE	CH3Cl3Si	15819.7	15869.6	15963.4	15920.9
2-METHYLTRIDECANE	C14H30	15773.7	15841.5	15819.5	15821.5
3-METHYLTRIDECANE	C14H30	15782	15772.2	15944.2	15876.4
2-METHYL-1-TRIDECANOL	C14H30O	18676.5	18558.9	18502.4	18536.7
2-METHYLUNDECANE	C12H26	15624	15517.5	15628.8	15594.9
3-METHYLUNDECANE	C12H26	15439.3	15757.7	15696.6	15689.2
2-METHYL-1-UNDECANOL	C12H26O	18774.6	18619.6	18956.3	18837.1
1-METHYLVINYL ACETATE	C5H8O2	17986.2	18311	18318	18282.7
1-METHYL-4-VINYLCYCLOHEXENE	C9H14	16836.8	17370.5	16935	17055.8
METHYL VINYL DICHLOROSILANE	C3H6Cl2Si	17159.9	16062.7	16907.3	16679.2
METHYL VINYL ETHER	C3H6O	16480.3	16576.4	16620	16592.9
MONOBUTYL SULFATE	C4H10O4S	21857.2	23335.5	23567.5	23326.9
MONOCHLOROBENZENE	C6H5Cl	19486.3	19481.8	19259.8	19349.1
MONOETHANOLAMINE	C2H7NO	28018.3	32512.7	29562.4	30293.1
MONOMETHYL TEREPHTHALATE	C9H8O4	22467	21816.1	22069.6	22033.3
MONOMETHYL UREA	C2H6N2O	29555.4	28338.9	29219.1	28988.7
MONOOLEIN	C21H40O4	17090	17870.9	17921.3	17823.1
MONO-TERT-BUTYLHYDROQUINONE	C10H14O2	19850	19155.6	19718.6	19562.8
MORPHOLINE	C4H9NO	21542.3	22101.1	22032.8	22004.3
NAPHTHACENE	C18H12	19236.2	18766.9	18508.1	18658.6
NAPHTHALENE	C10H8	19216.8	19464.8	19233	19300.9
2,6-NAPHTHALENEDICARBOXYLIC ACID	C12H8O4	17868.9	20237.7	20047	19886.4
N,N-DIETHYLANILINE	C10H15N	18842.9	18303.1	18661.3	18572
N,N-DIETHYLMETHYLAMINE	C5H13N	15092.6	15402.6	15244.5	15276.7
N,N-DIMETHYLACETAMIDE	C4H9NO	24863.4	23638.1	25100.5	24638
3-(N,N-DIMETHYLAMINO) PROPYLAMINE	C5H14N2	17055.3	19054.2	18707.6	18646.4
N,N-DIMETHYLANILINE	C8H11N	19616.9	19588.8	19780	19706.3
N,N-DIMETHYL-n-BUTYLAMINE	C6H15N	15550.6	15600.9	15532.5	15554.8
N,N-DIMETHYLFORMAMIDE	C3H7NO	24151.9	23984.5	24299.8	24190.4
NEOHEPTANOIC ACID	C7H14O2	20743.2	20768.3	20725.6	20740.2
NEOHEXANOIC ACID	C6H12O2	21027.6	21339.1	21161.7	21201.5
NEON	Ne	10382.9	6483.9	9332.69	8583.07
NEOPENTANE	C5H12	13237.3	12268.7	12498.8	12503.6
NEOPENTANOIC ACID	C5H10O2	22416	22902.7	23120.7	22984.8
NEOPENTYL GLYCOL	C5H12O2	22859.8	22625.3	23280.7	23042
NICOTINONITRILE	C6H4N2	23884.5	22778.4	23253.8	23174.3
NITRIC ACID	HNO3	27662.9	29451	29686.5	29413.5
NITRIC OXIDE	NO	22944	22846.7	23244.6	23095.2
2,2',2''-NITRILOTRIS-ACETONITRILE	C6H6N4	27038.3	27688.7	27836.6	27712.4
o-NITROANISOLE	C7H7NO3	23862	23891.2	23985.4	23944.8
NITROBENZENE	C6H5NO2	23937.5	23069.1	23315.3	23303.7
3-NITROBENZOTRIFLUORIDE	C7H4F3NO2	20511.1	20995.8	20749.4	20799.5
1-NITROBUTANE	C4H9NO2	20860.4	21008.9	20887.5	20921.2
o-NITRODIPHENYLAMINE	C12H10N2O2	20653.5	19832.6	19884.6	19945.9
p-NITRODIPHENYLAMINE	C12H10N2O2	22076.3	21423.5	21110.7	21301.1
NITROETHANE	C2H5NO2	23022.5	23235.2	23064.1	23111.3
NITROGEN DIOXIDE	NO2	29110.6	33111.7	33369.7	32866.4
NITROGEN TETROXIDE	N2O4	21550.5	20907.9	21542	21352.6
NITROGEN TRIFLUORIDE	F3N	12704.7	15025.4	15115.8	14847.5
NITROGLYCERINE	C3H5N3O9	23883.3	24321.8	24022.2	24098.2
NITROMETHANE	CH3NO2	26053.8	25899.4	25832.2	25874.5
1-NITROPROPANE	C3H7NO2	21544.6	21489.9	21537.8	21524.1
2-NITROPROPANE	C3H7NO2	21152.8	20821.8	21016	20971.4
N-NITROSODIETHANOLAMINE	C4H10N2O3	31202.3	32355.5	32701.8	32448
N-NITROSODIMETHYLAMINE	C2H6N2O	24636.4	24278.8	24382	24376.5
NITROSYL FLUORIDE	FNO	14811.4	16144.1	14566.2	15064.1
m-NITROTOLUENE	C7H7NO2	22017.1	22616.6	21500.4	21886.9
o-NITROTOLUENE	C7H7NO2	21555.5	21512.3	21504.9	21512.2
p-NITROTOLUENE	C7H7NO2	23050.6	23355.2	23334.7	23312.4
NITROUS OXIDE	N2O	9078.26	8432.25	8153.95	8329.87
N,N'-BIS(2-HYDROXYETHYL)ETHYLENEDIAMINE	C6H16N2O2	23855.6	24645.6	24053.7	24211.4
N,N'-DI(2-HYDROXYETHYL)PIPERAZINE	C8H18N2O2	20691.2	20919	20491.1	20639.5
N,N'-DI-tert-BUTYLETHYLENEDIAMINE	C10H24N2	15340.3	14300.4	14257.9	14378.9
n-NONACOSANE	C29H60	15511.5	15449	15646.2	15573.5
n-NONADECANE	C19H40	16289.8	16375.5	16175.4	16246.9
n-NONADECANOIC ACID	C19H38O2	17064.6	17368.7	17263.8	17275.3
1-NONADECANOL	C19H40O	17633	18243.3	18086.1	18088
1-NONADECENE	C19H38	16260.8	16753.5	16550.6	16582.5
NONANAL	C9H18O	18163.5	18351.2	18472.1	18405
n-NONANE	C9H20	15256.8	15327	15133.9	15204.1
n-NONANOIC ACID	C9H18O2	21099.9	21363.2	21107.6	21183.5
1-NONANOL	C9H20O	19850.1	20342.7	20055.3	20121
2-NONANOL	C9H20O	19321.1	19059.8	19383.8	19280.3
2-NONANONE	C9H18O	17922.6	18071.4	18371	18236.3
3-NONANONE	C9H18O	17774.4	17740.7	17982.5	17889.2
4-NONANONE	C9H18O	17768.7	17719.3	17577.8	17639.3
5-NONANONE	C9H18O	17739.7	17490.9	17536.4	17543.1
1-NONENE	C9H18	15548.2	15505.6	15530.7	15524.9
cis-2-NONENE	C9H18	15637.7	15998.3	15855.3	15876.5
trans-2-NONENE	C9H18	15529.8	15798	15665.6	15691.7
n-NONYL ACETATE	C11H22O2	17197	17294.2	17079.8	17155.9
n-NONYLBENZENE	C15H24	17284.3	17438.8	17060.7	17196.5
n-NONYL FORMATE	C10H20O2	16938.2	16968.5	16979.7	16972.2
n-NONYL MERCAPTAN	C9H20S	17570.5	17505.3	17682.6	17618.2
1-n-NONYLNAPHTHALENE	C19H26	18454.6	18195	18502.5	18405.5
n-NONYL n-UNDECYL PHTHALATE	C28H46O4	17221.5	17142.2	17280.2	17232.9
1-NONYNE	C9H16	16672.9	17040.2	16769.3	16840.9
o,p-BISPHENOL A	C15H16O2	21922	23578	23404.9	23308.5
n-OCTACOSANE	C28H58	15592.8	15687.2	15529.8	15583.3
1-OCTACOSENE	C28H56	15494.7	16059.3	15649.6	15757
OCTADECAMETHYLOCTASILOXANE	C18H54O7Si8	11539.5	11084.2	11069.1	11120.7
n-OCTADECANE	C18H38	16275.1	15985.1	16205.1	16146.1
n-OCTADECANOIC ACID	C18H36O2	18534	18762	18592	18637.2
1-OCTADECANOL	C18H38O	17643.6	17977.1	17712.1	17784.8
1-OCTADECENE	C18H36	16248.3	16235.4	16245.3	16242.7
n-OCTADECYLBENZENE	C24H42	16599.5	17016.3	16901.9	16906
OCTAFLUORO-2-BUTENE	C4F8	11466.2	11520.8	11342.4	11408.3
OCTAFLUOROCYCLOBUTANE	C4F8	12101	11833.5	11660.3	11756.3
OCTAFLUOROPROPANE	C3F8	9672.97	8870.27	8817.95	8919.15
OCTAHYDRO-PENTALENE-1-CARBOXYLIC ACID	C9H14O2	23202.9	24604.5	23176.2	23607.4
OCTAMETHYLCYCLOTETRASILOXANE	C8H24O4Si4	14024.2	11778.6	12941.9	12701.1
OCTAMETHYLTRISILOXANE	C8H24O2Si3	12793.6	12580.7	12621.9	12626.7
OCTANAL	C8H16O	17655.2	17743.5	18327.2	18084.9
n-OCTANE	C8H18	15189.3	15076.1	15380.5	15270.1
n-OCTANOIC ACID	C8H16O2	21064.1	21164.7	21256.8	21209.9
1-OCTANOL	C8H18O	20105.8	20148.9	20045.6	20082.6
2-OCTANOL	C8H18O	19370.3	19473.9	19189.3	19292.7
2-OCTANONE	C8H16O	17754.4	18079.7	18086.5	18051.2
3-OCTANONE	C8H16O	17604.9	17477.9	17600.2	17564
4-OCTANONE	C8H16O	18235.9	17705	17382.6	17564.6
1-OCTENE	C8H16	15363.5	15479.9	15306.3	15364.1
cis-2-OCTENE	C8H16	15451	15426.9	15493.9	15469.5
cis-3-OCTENE	C8H16	15358.5	15362.8	15305.1	15327.8
cis-4-OCTENE	C8H16	15345.1	15357.7	15420.2	15394
trans-2-OCTENE	C8H16	15405.2	15372.5	15271.7	15315.3
trans-3-OCTENE	C8H16	15373.5	15359.3	15275.3	15310.3
trans-4-OCTENE	C8H16	15399.7	15438.8	15302.7	15353.2
n-OCTYL ACETATE	C10H20O2	17071.3	16778.6	16783.9	16811.1
n-OCTYLBENZENE	C14H22	17518.9	17603.5	17691.1	17647.6
n-OCTYL FORMATE	C9H18O2	17248.4	16956	17110.6	17078
n-OCTYL MERCAPTAN	C8H18S	17303.7	17354.6	17486.9	17428.9
1-OCTYNE	C8H14	16158	16286.6	16393.9	16338.1
OLEIC ACID	C18H34O2	17598.3	17943.8	18209	18068.3
OXALIC ACID	C2H2O4	29247.2	28296.4	28739	28657
OXAZOLE	C3H3NO	17894.1	17686.4	17758.6	17750.5
2-OXAZOLIDONE	C3H5NO2	31259.7	32083.9	32270.6	32113.5
OXYGEN	O2	13982.7	14686.9	14479.3	14491.9
PALUSTRIC ACID	C20H30O2	15781.9	15104.7	15437.7	15372.2
PARALDEHYDE	C6H12O3	18879.6	17882.1	18189	18166
p,alpha-DIMETHYLBENZYL ALCOHOL	C9H12O	20075.7	20563.5	20407.9	20421.4
PENTACHLOROETHANE	C2HCl5	19243.4	19247.1	19474	19382.9
PENTACHLOROFLUOROETHANE	C2Cl5F	16143.2	15491.8	16022	15875
1,1,1,3,3-PENTACHLOROPROPANE	C3H3Cl5	19106.4	18577	18300.5	18464
n-PENTACOSANE	C25H52	15787.4	16037.7	15717.6	15820.6
n-PENTADECANE	C15H32	16161.1	16263.4	16239.7	16238.9
n-PENTADECANOIC ACID	C15H30O2	18768.3	19062.1	18621.8	18768.5
1-PENTADECANOL	C15H32O	18227	18559.5	17759.1	18046
1-PENTADECENE	C15H30	16514.6	16461.4	16363.1	16407.7
trans-2-PENTADECENE	C15H30	16094.3	16323.7	16035.5	16127.9
n-PENTADECYLBENZENE	C21H36	16570	16626.7	16600.8	16605.5
1,2-PENTADIENE	C5H8	16192.6	15883.7	16615.7	16353.8
1,4-PENTADIENE	C5H8	14723.9	14932.2	14703.9	14774.4
2,3-PENTADIENE	C5H8	16444.9	16354.7	16715.9	16580.4
cis-1,3-PENTADIENE	C5H8	16397	16088.5	16034.6	16087
trans-1,3-PENTADIENE	C5H8	16117	15645.6	15910.1	15851.4
PENTAERYTHRITOL TETRANITRATE	C5H8N4O12	17884.5	17387.3	17330.9	17403.2
PENTAETHYLBENZENE	C16H26	17659	17058	17434.2	17343.8
PENTAETHYLENE GLYCOL DIMETHYL ETHER	C12H26O6	19605.2	20142.6	19920.8	19955.8
PENTAETHYLENE GLYCOL MONOMETHYL ETHER	C11H24O6	19664.4	20482.1	20230.1	20249.1
PENTAETHYLENE HEXAMINE	C10H28N6	20911.9	18833.7	19816.7	19631.4
1,1,1,3,3-PENTAFLUOROBUTANE	C4H5F5	15994.9	14780.6	14757.7	14888.3
PENTAFLUOROETHANE	C2HF5	17176.1	12447.4	12929.6	13209.6
PENTAFLUOROETHYL METHYL ETHER	C3H3F5O	13548.1	13078	13067.6	13118.8
PENTAFLUOROPHENOL	C6F5OH	21202.7	21057.5	20940	21001.5
1,1,1,2,2-PENTAFLUOROPROPANE	C3H3F5	12298.9	11747.4	11851.5	11865
1,1,2,2,3-PENTAFLUOROPROPANE	C3H3F5	16435.5	15417.1	15063.9	15307
PENTAFLUORO(TRIFLUOROMETHYL)SULFUR	CF8S	11997.8	11221.5	11288	11339
PENTAMETHYLBENZENE	C11H16	18002.9	18160.9	17945.5	18015.9
trans-2,2,4,6,6-PENTAMETHYL-3-HEPTENE	C12H24	15187.2	15166.6	15466.5	15348.6
PENTANAL	C5H10O	18149.4	18385	18254.7	18283.3
n-PENTANE	C5H12	13747	14409	14407.3	14341.8
1,5-PENTANEDIAMINE	C5H14N2	21090.2	21298.5	21235.7	21240
1,4-PENTANEDIOL	C5H12O2	25156.3	25963.6	25651.6	25695.7
1,5-PENTANEDIOL	C5H12O2	25986.4	26751.9	27851.6	27335.1
2,4-PENTANEDIOL	C5H12O2	22850.9	23296.8	23059.3	23109.7
2-PENTANETHIOL	C5H12S	17030.3	17270	17493.4	17380.1
n-PENTANOIC ACID	C5H10O2	20773.9	21683	21726.7	21618.3
1-PENTANOL	C5H12O	20864.9	20524.1	20885.4	20774.9
2-PENTANOL	C5H12O	20539.1	21039.7	21302.7	21147.4
3-PENTANOL	C5H12O	19184.9	19182.5	19301.7	19254.3
2-PENTANONE	C5H10O	18605.1	18833.6	19159.9	19006.5
3-PENTANONE	C5H10O	18764.3	18560.5	18560.2	18580.7
PENTAPROPYLENE GLYCOL	C15H32O6	17621.2	17260.6	17521.7	17453.3
1-PENTENE	C5H10	14477	14508.6	14607.5	14564.8
cis-2-PENTENE	C5H10	14887.5	15286.8	14967.2	15055.1
trans-2-PENTENE	C5H10	14729.8	14881.6	14916.1	14887.2
1-PENTENE-3-YNE	C5H6	17733.6	17187.3	17204.5	17252.2
1-PENTENE-4-YNE	C5H6	16301.8	16569.9	16477.1	16487.4
2-PENTOXYETHANOL	C7H16O2	19608.1	19522	19546	19545
2-(2-PENTOXYETHOXY)ETHANOL	C9H20O3	20264.3	20575.7	20527.9	20515.9
n-PENTYL ACETATE	C7H14O2	17390.5	17648	17565.9	17573
n-PENTYLBENZENE	C11H16	17363.4	17254.7	17432.8	17372.4
n-PENTYLCYCLOHEXANE	C11H22	16147.3	16177.9	16204.9	16191
n-PENTYL FORMATE	C6H12O2	17771.5	17735.7	17736.4	17739.7
n-PENTYL MERCAPTAN	C5H12S	17705.9	17985	18234.9	18107.1
1-n-PENTYLNAPHTHALENE	C15H18	18855.9	18916.1	18632.7	18740.1
n-PENTYL n-BUTYRATE	C9H18O2	16889.4	16744.4	16442.3	16577.7
1-PENTYNE	C5H8	15768.8	16093.8	15591.8	15760.1
2-PENTYNE	C5H8	16488.6	16817.6	16732.3	16733.5
PERACETIC ACID	C2H4O3	25776	26486.4	26501.5	26424.4
PERFLUOROBUTANOIC ACID	C4HF7O2	17655	17615.6	16887.3	17182.6
PERFLUORO-n-DECANE	C10F22	13275.4	13264.9	12925.3	13062.2
PERFLUORO-n-DODECANE	C12F26	13147.9	12059.1	13144.1	12819
PERFLUORO-n-HEPTANE	C7F16	12568.2	12320.9	12278.9	12320.4
PERFLUORO-n-HEXANE	C6F14	12203.8	11952.3	11932.5	11965.5
PERFLUOROMETHYLCYCLOPENTANE	C6F12	12665	12513.3	12367.4	12440.9
PERFLUORO-n-NONANE	C9F20	12904.1	12378.3	12959.8	12779.8
PERFLUORO-n-OCTANE	C8F18	12863.5	11833	12121.2	12109
PERFLUORO-n-PENTANE	C5F12	11955.7	11642.8	11554.4	11621
alpha-PHELLANDRENE	C10H16	16783.2	16818.6	16421	16576.5
beta-PHELLANDRENE	C10H16	17051.5	17078.7	17117.6	17099.3
PHENANTHRENE	C14H10	20651.5	22847.6	21233.8	21659.7
p-PHENETIDINE	C8H11NO	22461.4	22773.3	22620.7	22650.5
PHENETOLE	C8H10O	19416	19446.7	19479.5	19463.3
PHENOL	C6H6O	24938.9	24519.2	25107.5	24914.2
PHENOTHIAZINE	C12H9NS	20848.5	20266.6	20462.2	20442.2
PHENYL ACETATE	C8H8O2	20814.4	20629.4	20787.5	20742.8
PHENYLACETONITRILE	C8H7N	22130	21981.9	21801.4	21888.4
2-PHENYLBUTENE-1	C10H12	17869.1	17476.2	17850.9	17740.3
cis-2-PHENYLBUTENE-2	C10H12	18760.6	18927.4	18864.6	18873.1
trans-2-PHENYLBUTENE-2	C10H12	18213.1	17797.6	18156.3	18054.4
m-PHENYLENEDIAMINE	C6H8N2	25875.7	25860.5	25807.7	25830.3
o-PHENYLENEDIAMINE	C6H8N2	25075	24814.3	24650.4	24742.1
p-PHENYLENEDIAMINE	C6H8N2	24969.9	24406.1	24757.9	24673.6
PHENYLHYDRAZINE	C6H8N2	24326.9	24437.6	24458.2	24438.9
1-PHENYLINDENE	C15H12	21162.1	21592.2	21444.5	21460.6
PHENYL ISOCYANATE	C7H5NO	20310.1	20674.9	20609.4	20599.1
PHENYL MERCAPTAN	C6H6S	21246.4	21145.2	21066.9	21108.3
PHENYLMETHYLDICHLOROSILANE	C7H8Cl2Si	18146.3	18180.8	18057.3	18103.3
1-PHENYLNAPHTHALENE	C16H12	20127.7	20145.2	20009	20061.7
1-PHENYL-1-PROPANOL	C9H12O	20331.3	20876.3	20915.5	20845.3
1-PHENYL-2-PROPANOL	C9H12O	20852.3	20673.2	20635.2	20668.3
2-PHENYL-1-PROPANOL	C9H12O	22146.1	22231.4	21606	21847.6
2-PHENYL-2-PROPANOL	C9H12O	19756.8	19737.1	19670.9	19699.4
2-PHENYLPROPIONALDEHYDE	C9H10O	18958	19048	18976.5	18996.1
PHENYLTRICHLOROSILANE	C6H5Cl3Si	18076.7	18065.3	17874.6	17952
PHOSGENE	CCl2O	16228.4	17029.3	17206	17055.2
PHOSPHINE	H3P	10761.4	9131.34	9487.3	9507.92
PHOSPHORUS OXYCHLORIDE	Cl3OP	20953.2	19820	20552.9	20373
PHOSPHORUS PENTAFLUORIDE	F5P	12040.6	11679.2	11143.5	11393.9
PHOSPHORUS TRICHLORIDE	Cl3P	18562.9	18269.7	18438.3	18400.2
PHOSPHORUS (WHITE)	P	42891.2	54842.5	55009.5	53747.6
PHTHALAN	C8H8O	21655.2	21453	21340.2	21405.5
PHTHALIC ANHYDRIDE	C8H4O3	23166.9	22669.5	22667.1	22717.8
PHTHALIDE	C8H6O2	24532.7	23082.2	23138.6	23261.1
PIMARIC ACID	C20H30O2	15864.6	14563.2	14694.5	14772.1
PIMELIC ACID	C7H12O4	26021.7	27164.5	27123.9	27025.9
alpha-PINENE	C10H16	16582.8	16180.5	16261.6	16269.4
beta-PINENE	C10H16	16941.3	17191.7	16815.3	16940.8
PIPERAZINE	C4H10N2	18649.1	18147.3	18108.3	18174.1
PIPERIDINE	C5H11N	19515.9	19359.4	19281.5	19328.3
PROPADIENE	C3H4	14880.5	14222.4	14299	14334.2
PROPANAL	C3H6O	20385.3	21021.7	20744.1	20791.5
PROPANE	C3H8	11946.1	11991.1	11829.6	11889.7
1,2-PROPANEDIAMINE	C3H10N2	20154.1	21788.3	21289.2	21325.4
1,3-PROPANEDIAMINE	C3H10N2	21363	23454.9	22342.5	22578.3
PROPANESULFONYL CHLORIDE	C3H7ClO2S	22049	21833.2	21657.8	21749.5
1-PROPANOL	C3H8O	23641.7	23959.9	24128.5	24029.3
PROPARGYL ALCOHOL	C3H4O	25727.2	26045.1	25489.1	25679.7
PROPARGYL CHLORIDE	C3H3Cl	19874.2	20343.8	20238.3	20233.6
cis-1-PROPENYLBENZENE	C9H10	18938.5	18695.2	18790.5	18776.7
trans-1-PROPENYLBENZENE	C9H10	18915.1	18491	18728.2	18675.7
PROPENYL CYCLOHEXENE	C9H14	17186.5	16995.6	17345.9	17224.9
beta-PROPIOLACTONE	C3H4O2	26633	26632.9	26778.1	26720
PROPIONIC ACID	C3H6O2	19371.8	20088.6	19972	19946.9
PROPIONIC ANHYDRIDE	C6H10O3	19443.7	19490	19459.7	19467.2
PROPIONITRILE	C3H5N	22618.8	22037.9	22340.6	22277.6
n-PROPYL ACETATE	C5H10O2	17832.3	18015.3	17586.3	17739.6
n-PROPYL ACRYLATE	C6H10O2	17448.6	17726.1	18014.6	17871.4
n-PROPYLAMINE	C3H9N	18173.1	18085.8	18227	18179.2
n-PROPYLBENZENE	C9H12	17589.4	17250.8	17607.3	17498.6
n-PROPYLBENZENE HYDROPEROXIDE	C9H12O2	22374.6	22341.2	22476.6	22425.8
n-PROPYL BENZOATE	C10H12O2	18444.6	19280.3	18485.1	18719.6
2-PROPYLBENZOTHIOPHENE	C11H12S	18955.3	18791.9	19030.3	18951.3
PROPYL CHLORIDE	C3H7Cl	16940.9	17784.7	18330.1	18027.6
n-PROPYLCYCLOHEXANE	C9H18	16281.6	16439.7	16285.9	16331.6
n-PROPYLCYCLOPENTANE	C8H16	16148.9	16318.6	16124.4	16185.1
PROPYLENE	C3H6	12374.1	11869.1	11933.5	11958.3
1,2-PROPYLENE GLYCOL	C3H8O2	26787.6	27837.9	28137.2	27912.5
1,3-PROPYLENE GLYCOL	C3H8O2	29598.5	30958.5	30268.6	30408.6
PROPYLENE GLYCOL ETHYL ETHER ACETATE	C7H14O3	18341.2	17857.4	17843	17897.2
PROPYLENE GLYCOL alpha-METHYLBENZYL ETHER	C11H16O2	19398.4	19300.8	19606.2	19493.8
PROPYLENE GLYCOL MONOALLYL ETHER	C6H12O2	19622.3	19456.5	19670.2	19601.3
PROPYLENE GLYCOL MONOMETHYL ETHER	C4H10O2	20453.6	20483.4	20503.9	20492.7
PROPYLENE GLYCOL MONOMETHYL ETHER ACETATE	C6H12O3	18130.2	18187.7	17846.5	17977.2
PROPYLENE GLYCOL n-BUTYL ETHER	C7H16O2	18222.5	18176.5	18207.9	18199.9
PROPYLENE GLYCOL n-PROPYL ETHER	C6H14O2	18938.8	18805	19004.2	18937.9
PROPYLENE GLYCOL 1-tert-BUTYL ETHER	C7H16O2	17718.1	17387.3	17601.6	17548.9
PROPYLENE GLYCOL 2-tert-BUTYL ETHER	C7H16O2	17663.7	17608.8	17684.3	17659.6
PROPYLENEIMINE	C3H7N	21168.3	21096.6	21168.2	21146.7
1,2-PROPYLENE OXIDE	C3H6O	18846.2	18549.2	19005.2	18852.5
1,3-PROPYLENE OXIDE	C3H6O	20077.8	20197.5	20400.7	20307.4
n-PROPYL FORMATE	C4H8O2	18332.5	18315.1	18416.2	18377.5
n-PROPYL IODIDE	C3H7I	19041.1	18246.5	18478.3	18465.1
n-PROPYL ISOBUTYRATE	C7H14O2	16972.2	16819.4	16646.3	16730.8
n-PROPYL MERCAPTAN	C3H8S	17838.4	18147.2	18017.5	18038.5
n-PROPYL METHACRYLATE	C7H12O2	17399.9	17354.5	17685.9	17557.9
1-n-PROPYLNAPHTHALENE	C13H14	19361	19293.2	19353.4	19336.1
n-PROPYL n-BUTYRATE	C7H14O2	16624.6	16368.3	16166.9	16273.1
n-PROPYL PROPIONATE	C6H12O2	17175.9	17269.3	17174.2	17202.9
2-n-PROPYLTHIOPHENE	C7H10S	18495.2	17859.2	18293.3	18183.3
PYRAZINE	C4H4N2	21863.7	21110.1	21603.5	21481.5
PYRAZOLE	C3H4N2	27221.4	26895.5	27112.3	27058.2
PYRENE	C16H10	20258.2	19882.6	19880.1	19918.7
PYRIDAZINE	C4H4N2	27427.4	26719	26931.7	26917.5
PYRIDINE	C5H5N	21628.2	21618.3	21655.1	21641.4
PYRIMIDINE	C4H4N2	24789.9	25070.1	24838.8	24903.3
PYROMELLITIC ACID	C10H6O8	25422.5	25613.7	25535.9	25547.9
PYRROLE	C4H5N	21101.1	22623.6	22671.1	22499.8
PYRROLIDINE	C4H9N	20208.9	20302.8	20398	20350.5
2-PYRROLIDONE	C4H7NO	29315.9	33217.8	31355.6	31710.3
PYRUVIC ACID	C3H4O3	25859.6	27344.2	27967	27569.5
QUATERPHENYL	C24H18	19284.8	20000.3	19735.7	19770
QUINALDINE	C10H9N	21110.8	21150.6	21118	21127.1
QUINOLINE	C9H7N	22024.3	21798.4	21674.8	21746.8
RADON	Rn	12639.3	12227.3	12767.9	12592.9
RDX	C3H6N6O6	24233	23405	23553.9	23577.1
SACCHARIN	C7H5NO3S	19879.3	19560.7	19650.6	19646.5
SALICYLALDEHYDE	C7H6O2	22228.6	21734	21838.9	21846.4
SALICYLIC ACID	C7H6O3	24817.9	24573	24707.7	24678.3
SEBACIC ACID	C10H18O4	23197.3	23712.6	23774.8	23698.4
sec-BUTENYL ACETATE	C6H10O2	17440.6	17277.7	17347.5	17335.9
sec-BUTENYL GLYCOL ETHER	C6H12O2	20182.2	19962.9	19877.7	19933.7
sec-BUTYL ACETATE	C6H12O2	16857.3	16299	16573.4	16519.5
sec-BUTYL ACRYLATE	C7H12O2	17552.3	17198.9	17325.2	17310
sec-BUTYLBENZENE	C10H14	17133.8	17127.8	17029.8	17069.6
sec-BUTYL CHLORIDE	C4H9Cl	16660.7	17034.3	16949.9	16946.3
sec-BUTYLCYCLOHEXANE	C10H20	16328.7	16278.1	16301.8	16297.4
sec-BUTYL FORMATE	C5H10O2	17282.4	17225.6	17327.1	17292.2
sec-BUTYL MERCAPTAN	C4H10S	17128.6	17087.5	17149.1	17128.6
sec-BUTYL-tert-BUTYL ETHER	C8H18O	15068.2	14564.1	14514.7	14584.9
SITOSTEROL	C29H50O	17615.9	17976.8	17884.3	17885.2
SORBITOL	C6H14O6	26555.1	26843.5	27600.2	37268.7
SQUALANE	C30H62	16515.1	14857	15358.8	15323.9
STIGMASTEROL	C29H48O	17416.5	17499.8	17372.9	17415.3
cis-STILBENE	C14H12	19264.6	18724.5	19069.1	18985.3
trans-STILBENE	C14H12	18872.3	18431.6	18688.5	18629.8
STYRENE	C8H8	19040.3	19165.5	19033.6	19073.8
STYRENE GLYCOL	C8H10O2	23389.6	23776.6	23418.4	23523
SUBERIC ACID	C8H14O4	23474.1	24293.2	23831.6	23934.3
SUCCINIC ACID	C4H6O4	28500.4	28548.3	28579.6	28562.3
SUCCINIC ANHYDRIDE	C4H4O3	29949.1	29877.7	29855.4	29871.4
SUCCINIMIDE	C4H5NO2	30753.9	31290.1	31070.7	31104.8
SUCCINONITRILE	C4H4N2	28847.5	28993.7	28777.9	28849.6
SUCROSE	C12H22O11	19045.9	18580.4	18381.8	18507.8
SULFAMIC ACID	H3NO3S	37118.8	39359.6	39378.1	39146.6
SULFOLANE	C4H8O2S	27384.1	26706.5	26876.9	26876.5
SULFUR DICHLORIDE	Cl2S	20613.9	21168.2	21154.6	21104.6
SULFUR DIOXIDE	O2S	21939	20991.4	21463.9	21369.6
SULFUR TRIOXIDE	O3S	28794.4	31025.8	30909.8	30733.1
SULFURYL CHLORIDE	Cl2O2S	19707.2	19273	19817.2	19642.9
SYRINGALDEHYDE	C9H10O4	23269.2	23441.3	23140.8	23243.8
SYRINGOL	C8H10O3	22814.5	23641.5	22748.4	23022.9
TEREPHTHALDEHYDE	C8H6O2	23025.6	22566.4	22557.3	22606.8
TEREPHTHALOYL CHLORIDE	C8H4Cl2O2	21248.9	21818.3	21629.7	21648.2
cis-1,8-TERPIN	C10H20O2	20495	19191.7	19244.9	19354
trans-1,8-TERPIN	C10H20O2	19076.9	18868.2	18956.6	18942.1
alpha-TERPINENE	C10H16	16894.9	17053.4	17021.9	17018.6
gamma-TERPINENE	C10H16	17346.9	17459.9	17617.6	17543.2
alpha-TERPINEOL	C10H18O	19008.3	18833.7	19100.7	19011.3
beta-TERPINEOL	C10H18O	18534.3	18602.6	18406.4	18478.1
TERPINOLENE	C10H16	17478.6	17547.5	17575.5	17557.4
p-tert-AMYLPHENOL	C11H16O	19008.2	18723.4	18837.5	18820.4
1-tert-BUTOXY-2-[2-(HYDROXY)PROPOXY]PROPANE	C10H22O3	19341.5	19533.9	19577.9	19541.1
1-tert-BUTOXY-2-[2-(tert-BUTOXY)PROPOXY]PROPANE	C14H30O3	18541.8	17948.7	18606.4	18402.6
tert-BUTYL ACETATE	C6H12O2	16496.1	16219.9	16294.6	16292.4
tert-BUTYLAMINE	C4H11N	17193.8	15269.9	15583.5	15650.4
1,4-DI-tert-BUTYLBENZENE	C14H22	15429.7	15813.8	15437.8	15549.8
tert-BUTYLBENZENE	C10H14	17220	16784	16956.8	16931.3
p-tert-BUTYLCATECHOL	C10H14O2	21683.1	21959.9	22101.6	22017.3
tert-BUTYL CHLORIDE	C4H9Cl	17562.8	17168.3	17017	17117
2,6-DI-tert-BUTYL-p-CRESOL	C15H24O	16735.7	15505.1	15626.6	15701.1
tert-BUTYLCYCLOHEXANE	C10H20	16126.1	16254.4	16218.7	16220.1
p-tert-BUTYL ETHYLBENZENE	C12H18	16665.4	16824.7	16432.2	16573.3
tert-BUTYL ETHYL ETHER	C6H14O	15549.6	14844.8	14887.9	14941.1
tert-BUTYLFORMAMIDE	C5H11NO	22251.1	22373.1	22264.7	22295.9
tert-BUTYL FORMATE	C5H10O2	17088.7	16673.1	17012.9	16918.5
1,3-DI-TERT-BUTYL GLYCERIN	C11H24O3	17073.7	16729.9	16510.6	16632.7
tert-BUTYL MERCAPTAN	C4H10S	17390.6	16374.2	16161.8	16348.4
tert-BUTYL METHACRYLATE	C8H14O2	16449.5	16424.8	16272.1	16335.7
m-tert-BUTYLPHENOL	C10H14O	20796.2	21042.6	20753.4	20844.4
o-tert-BUTYLPHENOL	C10H14O	19517.8	20341.8	19569.3	19795.9
p-tert-BUTYLPHENOL	C10H14O	19867.7	19656	19898.2	19822.5
p-tert-BUTYLSTYRENE	C12H16	17675.8	17451.8	17779.8	17671
tert-DODECYL MERCAPTAN	C12H26S	16648.1	16247	16457.3	16413.3
tert-NONYL MERCAPTAN	C9H20S	17036.5	16969.2	17092	17049.6
tert-OCTYL MERCAPTAN	C8H18S	16471.7	16068.5	16501.1	16368.4
p-tert-OCTYLPHENOL	C14H22O	18751.3	18488.5	18325.2	18416.8
1,1,2,2-TETRABROMOETHANE	C2H2Br4	22498	22641.5	22452.6	22513.8
1,1,1,2-TETRACHLORODIFLUOROETHANE	C2Cl4F2	16705.5	16520.6	16394.8	16463.6
1,1,2,2-TETRACHLORODIFLUOROETHANE	C2Cl4F2	16983.7	16376.6	16362	16428.6
1,1,1,2-TETRACHLOROETHANE	C2H2Cl4	19265.8	19180.4	19165.5	19180
1,1,2,2-TETRACHLOROETHANE	C2H2Cl4	19901.4	19651	19642.7	19671
TETRACHLOROETHYLENE	C2Cl4	18737.3	18660.8	18655.1	18665
TETRACHLOROSILANE	Cl4Si	15691.4	15650.8	15867.5	15784.8
TETRACHLOROTHIOPHENE	C4Cl4S	20866.7	19944.3	19440	19733.9
1-TETRACONTENE	C40H80	15651.3	16073.8	15481.3	15676
n-TETRACOSANE	C24H50	15768.4	14656.5	15592.6	15329.4
1-TETRACOSENE	C24H48	15748.4	15675.2	15862.2	15794.7
TETRADECAMETHYLHEXASILOXANE	C14H42O5Si6	11712.8	11212.3	11119	11206.4
n-TETRADECANE	C14H30	16078.9	15722.1	15925.5	15879.9
TETRADECANEDIOIC ACID	C14H26O4	20446.8	20936	21069.6	20967.3
n-TETRADECANOIC ACID	C14H28O2	19304.2	19357.7	19295.2	19314.8
1-TETRADECANOL	C14H30O	18912	18948.7	18738.9	18819.1
1-TETRADECENE	C14H28	16422.9	16294	16221.1	16263.1
n-TETRADECYLBENZENE	C20H34	16629.6	16824.8	16896.7	16848.4
TETRAETHOXYSILANE	C8H20O4Si	15555.4	14705.6	14868.7	14888.5
1,2,3,5-TETRAETHYLBENZENE	C14H22	17675.2	16777.5	17715.7	17430.2
TETRAETHYLENE GLYCOL	C8H18O5	21836.6	23905	24190	23869.1
TETRAETHYLENE GLYCOL DIMETHYL ETHER	C10H22O5	18315.5	18395.7	18269.5	18312
TETRAETHYLENE GLYCOL MONOBUTYL ETHER	C12H26O5	18734.1	18660.5	18868.5	18792.7
TETRAETHYLENE GLYCOL MONOETHYL ETHER	C10H22O5	19795.4	20170.8	20059.9	20066.7
TETRAETHYLENE GLYCOL MONOMETHYL ETHER	C9H20O5	20589.7	20724.2	20632	20655.4
TETRAETHYLENEPENTAMINE	C8H23N5	22744.5	23511.4	23326.3	23323.7
1,1,1,2-TETRAFLUOROETHANE	C2H2F4	14902.6	14607.3	15493.1	15168.3
1,1,2,2-TETRAFLUOROETHANE	C2H2F4	14802.1	14477.1	14588.5	14576.4
2,3,3,3-TETRAFLUOROPROPENE	C3H2F4	12392.9	11832.5	11882.3	11918.4
trans-1,3,3,3-TETRAFLUOROPROPENE	C3H2F4	13870.4	12791.5	12818.9	12915.8
1,2,3,6-TETRAHYDROBENZALDEHYDE	C7H10O	20216.5	20487.1	20446.1	20435.4
1,2,3,6-TETRAHYDROBENZYL ALCOHOL	C7H12O	21365.5	21730	21464.5	21534.2
TETRAHYDROFURAN	C4H8O	18791.4	19002.3	18993.1	18975.7
4-[(TETRAHYDRO-2-FURANYL)OXY]-1-BUTANOL	C8H16O3	20352	21115.5	21149.4	21059.5
TETRAHYDROFURFURYL ALCOHOL	C5H10O2	22149.8	22241.4	22698.4	22506.4
1,2,3,4-TETRAHYDRONAPHTHALENE	C10H12	19610.2	19811.5	19654.1	19697
TETRAHYDROPYRAN	C5H10O	18289.1	18275.8	18252.7	18263.3
TETRAHYDROTHIOPHENE	C4H8S	19467.2	20493.7	19849.1	20004.3
1,2,4,5-TETRAISOPROPYLBENZENE	C18H30	14665.2	13994.2	13953.4	14036.8
TETRAMANTANE	C22H28	16880.6	16224	16192.4	16270.7
1,2,3,4-TETRAMETHYLBENZENE	C10H14	19074.2	18828.7	18776.4	18821.8
1,2,3,5-TETRAMETHYLBENZENE	C10H14	18252.1	18610.3	18390.4	18442.5
1,2,4,5-TETRAMETHYLBENZENE	C10H14	17087.6	17094.8	17042	17062.4
2,2,3,3-TETRAMETHYLBUTANE	C8H18	13958.5	12917.7	12759.2	12926.7
2,2,4,4-TETRAMETHYL-1,3-CYCLOBUTANEDIOL	C8H16O2	19543.7	19435.2	19379.8	19412.8
1,2,3,4-TETRAMETHYLCYCLOHEXANE	C10H20	16444.6	16338.6	16392.7	16381.7
TETRAMETHYLETHYLENEDIAMINE	C6H16N2	15530.8	15325.3	15727	15586.9
2,2,3,3-TETRAMETHYLHEXANE	C10H22	15166.9	15175.8	15213.6	15197.6
2,2,5,5-TETRAMETHYLHEXANE	C10H22	14463.8	14280.7	14347.3	14339
2,2,3,3-TETRAMETHYLPENTANE	C9H20	15267.5	15169.8	15127.6	15154.3
2,2,3,4-TETRAMETHYLPENTANE	C9H20	15045.4	15363.2	15327.4	15309.9
2,2,4,4-TETRAMETHYLPENTANE	C9H20	14449.7	14228.9	14409	14359.1
2,3,3,4-TETRAMETHYLPENTANE	C9H20	15298.3	15437.4	15677.8	15567.7
TETRAMETHYLSILANE	C4H12Si	13312.1	12837	12954.6	12955.1
TETRANITROMETHANE	CN4O8	18314.1	18426.3	17879.8	18087.2
1,1,2,2-TETRAPHENYLETHANE	C26H22	16191	12337.4	14650.4	14110.6
TETRAPHENYLETHYLENE	C26H20	18355.1	18346.3	18240.3	18283.6
TETRAPHENYLMETHANE	C25H20	17640.8	16903.4	17119.2	17106.6
TETRAPROPYLENE GLYCOL	C12H26O5	18481.1	18718.7	18562.6	18601.3
TETRYL	C7H5N5O8	22834.5	22905.7	22621.9	22728.3
THIACYCLOPROPANE	C2H4S	21556.5	21754.8	21644.5	21668.8
THIAINDAN	C8H8S	21601.4	21081.6	21132.5	21164.1
THIODIGLYCOL	C4H10O2S	29190	29762.2	29163.6	29345.8
THIOGLYCOLIC ACID	C2H4O2S	28235.3	29020.7	28713	28757.5
THIONYL CHLORIDE	Cl2OS	19953.9	19884.4	19705.2	19783.8
THIOPHENE	C4H4S	20029.5	19945.5	20266.7	20146.6
THIOUREA	CH4N2S	26343.8	25032.1	24821.1	25036.7
THYMOL	C10H14O	19553.9	18673.7	19253.3	19109.5
TIN(IV) CHLORIDE	Cl4Sn	18005.4	17337.9	17942.7	17767.5
alpha-TOCOPHEROL	C29H50O2	17077	16960.9	16694.2	16812.5
m-TOLUALDEHYDE	C8H8O	21603.1	21106.4	20754.6	20945
o-TOLUALDEHYDE	C8H8O	21674.7	20674.2	20334.3	20570.3
p-TOLUALDEHYDE	C8H8O	21367.8	21007.1	20830.9	20937.4
TOLUENE	C7H8	18191.2	17870	18006.3	17983.9
2,4-TOLUENE DIISOCYANATE	C9H6N2O2	21689.1	22043.8	22107	22046.2
m-TOLUIC ACID	C8H8O2	23525.3	23437.6	23666.7	23583.8
o-TOLUIC ACID	C8H8O2	23014.5	22679.5	21794.1	22181.8
p-TOLUIC ACID	C8H8O2	22806.9	22998	22693.6	22796.2
m-TOLUIDINE	C7H9N	22683.9	22880.3	22884.3	22863
o-TOLUIDINE	C7H9N	22602.2	22308.4	22609	22518.2
p-TOLUIDINE	C7H9N	21965.4	21950.1	21954.9	21954.5
5-o-TOLYL-2-PENTENE	C12H16	17728.3	17637.5	17725.3	17699.2
TRIACETONE ALCOHOL	C9H18O3	19849.5	19050.7	19321.7	19293.2
n-TRIACONTANE	C30H62	15430.4	15441.4	15479.4	15463.1
1-TRIACONTENE	C30H60	15231.5	15315.9	15111.6	15184.9
TRIALLYLAMINE	C9H15N	16286.2	15834.4	15957.5	15953.5
TRIAMANTANE	C18H24	14822.2	13037.4	12705.6	13016.8
TRIAMYLAMINE	C15H33N	16178.6	15700	15617.9	15698.6
TRIBROMOMETHANE	CHBr3	21719.3	21162.8	21260.4	21277
TRI-n-BUTYLAMINE	C12H27N	16283.9	15767.5	16026.3	15974.4
TRI-n-BUTYL PHOSPHATE	C12H27O4P	17580.5	16841.1	17334.4	17211.1
TRICAPRIN	C33H62O6	16067.9	15368.4	15507.6	15521.9
TRICAPRYLIN	C27H50O6	16441	15713	16102.8	16019.7
TRICHLOROACETALDEHYDE	C2HCl3O	19175.4	18866.4	18959.8	18953.3
TRICHLOROACETIC ACID	C2HCl3O2	23839.7	23337.1	23288.2	23358
TRICHLOROACETYL CHLORIDE	C2Cl4O	18255.4	18014.1	18049.7	18059.6
1,2,3-TRICHLOROBENZENE	C6H3Cl3	21299.3	21136.5	21881.4	21599.7
1,2,4-TRICHLOROBENZENE	C6H3Cl3	20872.1	20861.6	21147.8	21034.4
1,3,5-TRICHLOROBENZENE	C6H3Cl3	18853.7	19174	18894.3	18974.2
1,1,1-TRICHLOROETHANE	C2H3Cl3	19187.3	18697.4	18550.6	18658.3
1,1,2-TRICHLOROETHANE	C2H3Cl3	19859.4	19779.6	19984	19910.2
TRICHLOROETHYLENE	C2HCl3	18517.5	18635.7	18617.2	18612.8
1,1,1-TRICHLOROFLUOROETHANE	C2H2Cl3F	16190.8	18889.6	17038.8	17509.2
TRICHLOROFLUOROMETHANE	CCl3F	15597.7	15407.4	15519.1	15493.5
1,2,3-TRICHLOROPROPANE	C3H5Cl3	20399.6	20154.8	21124.7	20761.2
TRICHLOROSILANE	Cl3HSi	15685.3	15370.1	15268.9	15340.9
1,1,1-TRICHLOROTRIFLUOROETHANE	C2Cl3F3	17049.6	14722.2	15680.5	15529.9
1,1,2-TRICHLOROTRIFLUOROETHANE	C2Cl3F3	14966.1	14530.7	14851.9	14767
n-TRICOSANE	C23H48	15831.2	15550.9	15776.5	15714.3
TRI-o-CRESYL PHOSPHATE	C21H21O4P	18710.2	18697.9	18710.6	18706.8
TRIDECAFLUOROHEPTANOIC ACID	C7HF13O2	17242.8	17158.3	17072.2	17115.1
TRIDECANAL	C13H26O	18028.9	18048	18372	18240.5
n-TRIDECANE	C13H28	15915.8	15705.6	15728	15740.1
n-TRIDECANOIC ACID	C13H26O2	18657.3	18836.1	18292.2	18491.9
1-TRIDECANOL	C13H28O	18790.2	19002.6	18713	18807.6
1-TRIDECENE	C13H26	15945.4	15766.3	15728.9	15761.8
n-TRIDECYLBENZENE	C19H32	16861.7	16832.6	16829.4	16833.6
TRIETHANOLAMINE	C6H15NO3	26575.3	28120.3	27517.7	27604.2
3-(TRIETHOXYSILYL)PROPIONITRILE	C9H19NO3Si	17335.2	17261.1	16671.7	16914.8
TRIETHYLAMINE	C6H15N	15486.6	15374.1	14757.2	15015.2
1,2,4-TRIETHYLBENZENE	C12H18	17544.5	17265.6	17310.4	17320.4
1,3,5-TRIETHYLBENZENE	C12H18	17393.6	17160	17117.4	17157.8
TRIETHYLENEDIAMINE	C6H12N2	15849.6	16699.5	16896.1	16732.5
TRIETHYLENE GLYCOL	C6H14O4	24038.4	24813.6	25601.9	25209.1
TRIETHYLENE GLYCOL BIS(2-ETHYLHEXANOATE)	C22H42O6	16263.5	16049.6	16206.5	16165.1
TRIETHYLENE GLYCOL DIMETHYL ETHER	C8H18O4	18153.6	18106.1	17812.6	17934.8
TRIETHYLENE GLYCOL MONOETHYL ETHER	C8H18O4	18585.9	19465.3	19670.8	19500.7
TRIETHYLENE GLYCOL MONOMETHYL ETHER	C7H16O4	19411.5	20133.8	20161.5	20078.2
TRIETHYLENE GLYCOL n-BUTYL ETHER	C10H22O4	17964.8	17900.8	17881.5	17895.6
TRIETHYLENE GLYCOL n-HEXYL ETHER	C12H26O4	17320.1	17317.3	17356.7	17341.2
TRIETHYLENE GLYCOL n-PROPYL ETHER	C9H20O4	18512.6	19068.2	19116.4	19041.5
TRIETHYLENETETRAMINE	C6H18N4	23478.5	23997.6	23902.6	23888.7
TRIETHYL ORTHOFORMATE	C7H16O3	16725.8	15895.2	16163.4	16139.2
TRIETHYL PHOSPHATE	C6H15O4P	18284.7	18291.4	18221.6	18248.9
TRIFLUOROACETAMIDE	C2H2F3NO	27203.1	27859.2	27508	27582.9
TRIFLUOROACETIC ACID	C2HF3O2	20699	21785.2	21633.9	21585.8
1,1,1-TRIFLUOROETHANE	C2H3F3	14174.3	12698.7	13072.2	13070.4
1,1,2-TRIFLUOROETHANE	C2H3F3	17464.6	18143.1	17514	17697.8
TRIFLUOROIODOMETHANE	CF3I	13931.8	13005	13009.9	13100.7
TRIFLUOROMETHANE	CHF3	10333.9	6959.18	5806.48	6605.03
3,3,3-TRIFLUOROPROPENE	C3H3F3	14873	14528.9	15499.8	15145.9
(3,3,3-TRIFLUOROPROPYL)METHYLDICHLOROSILANE	C4H7Cl2F3Si	16906.4	15963.8	16183.7	16190
TRI-n-HEPTYL TRIMELLITATE	C30H48O6	16901.2	16329.5	16722.8	16622.7
TRIISOBUTYL ALUMINUM	C12H27Al	16415.5	15966.3	15688.1	15844.3
1,3,5-TRIISOPROPYLBENZENE	C15H24	16232.5	15583.8	16032.9	15918.1
TRILAURIN	C39H74O6	15665.3	15353.1	15256.4	15326.3
TRIMELLITIC ACID	C9H6O6	24276.2	23935.6	23908.1	23953.2
TRIMELLITIC ANHYDRIDE	C9H4O5	24288.8	24369	24279	24307
TRIMETHOXYSILANE	C3H10O3Si	15756.5	16102	15773.3	15870.2
3-(TRIMETHOXYSILYL)-1-PROPANETHIOL	C6H16O3SSi	17284.9	17294.8	17453.3	17388.9
TRIMETHYLAMINE	C3H9N	14070.2	14231.2	14395.3	14313.5
1,2,3-TRIMETHYLBENZENE	C9H12	18582.8	18393.3	18436.4	18438.1
1,2,4-TRIMETHYLBENZENE	C9H12	17958	17939.5	18079.5	18025.3
TRIMETHYL BORATE	C3H9BO3	16020.5	16429.8	16468	16411.8
2,2,3-TRIMETHYLBUTANE	C7H16	14542.8	14338.6	14420.9	14408.4
2,3,3-TRIMETHYL-1-BUTENE	C7H14	14741.3	14812	14900.8	14858.2
TRIMETHYLCHLOROSILANE	C3H9ClSi	15515	15103.3	14749.1	14932
1,1,3-TRIMETHYLCYCLOHEXANE	C9H18	15587	15772.5	15745.3	15737.6
1-trans-3,5-TRIMETHYLCYCLOHEXANE	C9H18	15883.8	15925.6	15828.7	15863.3
1,1,2-TRIMETHYLCYCLOPENTANE	C8H16	15699.9	15104.7	15475.7	15386.8
1,1,3-TRIMETHYLCYCLOPENTANE	C8H16	14978.1	14789.6	14947.1	14903
1-cis-2-trans-3-TRIMETHYLCYCLOPENTANE	C8H16	15634.3	15505.7	15466.9	15495.3
1-cis-2-trans-4-TRIMETHYLCYCLOPENTANE	C8H16	15390.7	15205.1	15107.6	15165.1
TRIMETHYLENE SULFIDE	C3H6S	20931.5	21935.9	21472.9	21557.6
1,2,3-TRIMETHYL-4-ETHYLBENZENE	C11H16	18508	18361.7	18672.1	18562.6
1,2,4-TRIMETHYL-3-ETHYLBENZENE	C11H16	17537	17210	17120.2	17188.8
1,2,4-TRIMETHYL-5-ETHYLBENZENE	C11H16	17725.3	17620.5	17670.7	17661.1
3,3,5-TRIMETHYLHEPTANE	C10H22	15311.3	15275.7	15037.6	15136.4
2,2,5-TRIMETHYLHEXANE	C9H20	14496.1	14204.4	14579.5	14458.6
2,4,4-TRIMETHYLHEXANE	C9H20	15051.7	14753.3	14787	14803.4
1,1,5-TRIMETHYLINDAN	C12H16	17188.5	17188.1	17270.7	17237.7
1,2,3-TRIMETHYLINDENE	C12H14	18182.1	17675.2	17914.6	17869.6
2,6,8-TRIMETHYL-4-NONANONE	C12H24O	16973.3	16301.8	16090.7	16242.3
TRIMETHYLOLPROPANE	C6H14O3	25719.4	26694.6	26306	26364
2,2,3-TRIMETHYLPENTANE	C8H18	14984.4	15136.3	15123.8	15113.6
2,2,4-TRIMETHYLPENTANE	C8H18	14408	14245.3	14307	14298.6
2,3,3-TRIMETHYLPENTANE	C8H18	14950	15081.3	15031.8	15038.5
2,3,4-TRIMETHYLPENTANE	C8H18	14978.8	15212.9	15195.6	15179.1
2,2,4-TRIMETHYL-1,3-PENTANEDIOL DIISOBUTYRATE	C16H30O4	16688.7	15724	15235.4	15527.3
2,4,4-TRIMETHYL-1-PENTENE	C8H16	14841.8	14709.6	14846	14804.7
2,4,4-TRIMETHYL-2-PENTENE	C8H16	15036.3	14616.3	14901.1	14829.2
TRIMETHYL PHOSPHATE	C3H9O4P	21100.8	21259.2	21403.1	21329.7
2,4,6-TRIMETHYLPYRIDINE	C8H11N	19218.9	18904.3	18844	18899.6
TRIMETHYL SILANE	C3H10Si	12934.4	12682.2	12599.5	12657.8
TRIMETHYL SILANOL	C3H10OSi	20574.5	20227	20005	20128.6
2,3,5-TRIMETHYLTHIOPHENE	C7H10S	18499.8	18224.2	18466.5	18397.1
2,4,6-TRINITROPHENOL	C6H3N3O7	24190.9	25397.6	25491.3	25333.1
TRI-n-OCTYLAMINE	C24H51N	16236.9	16024.5	15854.7	15943.9
TRIOCTYL TRIMELLITATE	C33H54O6	15727.1	14653.4	14903.1	14910.6
TRIPHENYLENE	C18H12	20136.3	20222.3	20344.6	20287.1
TRIPHENYLMETHANE	C19H16	19071	19357.9	18637.5	18896.9
TRIPHENYL PHOSPHATE	C18H15O4P	19713.1	19452.3	19744.6	19653.8
TRIPHENYLPHOSPHINE	C18H15P	18900.5	18921.8	19027.9	18983.3
TRIPROPYLAMINE	C9H21N	15622.9	15509.8	15586.4	15567.1
TRIPROPYLENE GLYCOL MONOETHYL ETHER	C11H24O4	17698.1	17304.6	18002.1	17762.5
TRIPROPYLENE GLYCOL MONOMETHYL ETHER	C10H22O4	17999.4	17904.6	18267	18131.5
1,3,5-TRI-tert-BUTYLBENZENE	C18H30	15658.7	14668.2	14900.5	14906.6
UNDECANAL	C11H22O	17903.2	17620.1	17734.1	17716.8
n-UNDECANE	C11H24	15723.4	15774.9	15904.2	15847.4
n-UNDECANOIC ACID	C11H22O2	20263	20022.3	20127.7	20109.6
1-UNDECANOL	C11H24O	19939.7	19497.3	19392.6	19478.7
1-UNDECENE	C11H22	15765.8	15475	15535.7	15540.5
n-UNDECYLBENZENE	C17H28	17053.7	17687.9	16763.6	17069.9
UNDECYL MERCAPTAN	C11H24S	17901.9	17671.5	17895.2	17828.8
gamma-VALEROLACTONE	C5H8O2	24006.1	23060.2	23991.7	23713.7
VALERONITRILE	C5H9N	20317.1	19993.7	19887.5	19962.3
VANILLIC ACID	C8H8O4	21994	22716.4	22661.8	22611.4
VANILLIN	C8H8O3	23899	23742.9	23795.9	23790.3
VINYL ACETATE	C4H6O2	18016.3	18217.8	17822.3	17960.4
VINYLACETONITRILE	C4H5N	21733.5	21971	21842.9	21870.4
VINYLACETYLENE	C4H4	16509	16286.6	16390.6	16371.3
VINYL BROMIDE	C2H3Br	17574.3	17757.2	17391.2	17519.3
VINYL CHLORIDE	C2H3Cl	15942.4	16033.7	16139.1	16087.8
VINYLCYCLOHEXANE	C8H14	17106.3	16796.9	16455.4	16623
VINYLCYCLOHEXENE	C8H12	17050.8	17206.6	17165.5	17166.3
VINYLETHYLENE CARBONATE	C5H6O3	25651.8	25820.2	25692.4	25726.7
VINYL FLUORIDE	C2H3F	13778.7	12595.5	12779.8	12824.4
VINYL FORMATE	C3H4O2	18498	18702.2	19087.1	18912.7
VINYLNORBORNENE	C9H12	17128.4	16778.2	16937.8	16909
VINYL PIVALATE	C7H12O2	16179.2	16155.9	16229	16202.1
VINYL PROPIONATE	C5H8O2	17902	17942.4	18005.9	17976.4
VINYLTRICHLOROSILANE	C2H3Cl3Si	16232	16054.9	15999.7	16039.5
VINYLTRIMETHOXYSILANE	C5H12O3Si	16209.6	16120.1	16017.9	16067.7
WATER	H2O	37739.1	39030.6	48624.5	44657.8
XENON	Xe	14703.9	15476.4	16169.9	15815.3
m-XYLENE	C8H10	18151	18001.7	17995.7	18013
o-XYLENE	C8H10	18508.1	18399.8	18249.7	18320.6
p-XYLENE	C8H10	18137.8	17865.6	17842.6	17879
2,3-XYLENOL	C8H10O	20060	19487	20485.4	20143.4
2,4-XYLENOL	C8H10O	22110.1	22159.5	22111.5	22125.8
2,5-XYLENOL	C8H10O	20770	20745.5	21026.1	20916.3
2,6-XYLENOL	C8H10O	19793.5	19607.2	19926.6	19817.5
3,4-XYLENOL	C8H10O	22389.3	21080.9	22290.3	21937.4
3,5-XYLENOL	C8H10O	21907.1	21162.3	22151.1	21830.1
XYLITOL	C5H12O5	28754.8	31123.9	30827.6	30709.2
